# Supplementary material for: Expression Profiling the Temperature-Dependent Amphibian Response to Infection by Batrachochytrium dendrobatidis
Source: PLoS One. 2009 Dec 22;4(12):e8408. doi: 10.1371/journal.pone.0008408 (PMC2794374; doi:10.1371/journal.pone.0008408)
Supplement: Table S1 — Expression values of the microarray results in spleen of animals Bd infected after 7 or 42 days. For statistical analysis, see the Materials and Methods section of the manuscript. Fully annotated microarray data have been deposited under ArrayExpress with accession number E-MEXP-1936. (0.18 MB XLS) [file pone.0008408.s002.xls]

## Sheet: table
Supplementary Table : Complete list of microarray hits having a p-value <0.01 and a fold change >=|1.5|. Data are expressed as the average fold change of three repeats in each time point.
Normalization: 1) normalized to universal controls on each slide (per spot, per chip: LOWESS smoothing); 2) infected samples normalized to control samples of corresponding temperature and time group
	7 days										42 days
	up regulation					down regulation					up regulation					down regulation
	Gene ID	Oligo ID	Fold Change	t-test P-value	Hypothetical function	Gene ID	Oligo ID	Fold Change	t-test P-value	Hypothetical function	Gene ID	Oligo ID	Fold Change	t-test P-value	Hypothetical function	Gene ID	Oligo ID	Fold Change	t-test P-value	Hypothetical function
18 oC	Xt4.1-TNeu097g06.3	Xt_10006455	40.7442	8.31624e-05		Xt4.1-EC2CAA29DC04.5	Xt_10003857	0.660868	0.000481717	ribosomal protein S23; 40S ribosomal protein S23; homolog of yeast ribosomalprotein S28 [Homo sapiens]	Xt4.1-IMAGE:7016390.5	Xt_10001963	72.662	8.22746e-05	pancreatic carboxypeptidase A1 precursor; Carboxypeptidase A [Homo sapiens]	Xt4.1-EC2BBA35BD11.3	Xt_10003253	0.665522	0.00175002	similar to RIKEN cDNA 5630401J11 [Homo sapiens]
	Xt4.1-IMAGE:7023795.5	Xt_10006540	31.2065	7.60838e-06		Xt4.1-TTpA041d05.5.5	Xt_10008844	0.659753	0.000404518		Xt4.1-IMAGE:7003338.5.5	Xt_10009843	56.0931	0.00110395	pancreatic carboxypeptidase B1 precursor; pancreas-specific protein [Homosapiens]	TGas101c11	Xt_10010614	0.661581	0.00486692
	Xt4.1-TTpA033a05.3	Xt_10002125	14.1031	0.00124183	paired box (5I707) [Caenorhabditis elegans]	Xt4.1-TNeu113i04.3.5	Xt_10008780	0.6595	0.000480643	ribosomal protein L5; 60S ribosomal protein L5 [Homo sapiens]	Xt4.1-TEgg129h13.5	Xt_10010763	30.502	0.0063227		Xt4.1-TGas114b07.5	Xt_10004603	0.658685	0.000595866	diaphanous 2 isoform 156 [Homo sapiens]
	Xt4.1-TGas103j21.3.5	Xt_10009869	8.40293	0.00111924		Xt4.1-TEgg038b04.3	Xt_10000232	0.632145	0.000121189	step II splicing factor SLU7 [Homo sapiens]	Xt4.1-EC2BBA23DC05.5	Xt_10008119	28.4103	0.00736542		Xt4.1-TGas131i19.3	Xt_10001647	0.648552	0.00516946	polyglutamine binding protein 1; nuclear protein containing WW domain 38 kD[Homo sapiens]
	Xt4.1-TNeu091i14.3	Xt_10007994	8.04522	0.000440995	TPA: SET and MYND domain protein 2 [Takifugu rubripes]	Xt4.1-TTpA010h06.5	Xt_10001523	0.632049	0.000828513	hypothetical protein DKFZp586C1924 [Homo sapiens]	Xt4.1-TEgg038a03.3.5	Xt_10009113	24.7681	0.0031114	DNA replication factor; Double parked, Drosophila, homolog of [Homo sapiens]	Xt4.1-TEgg039d07.3	Xt_10002286	0.640533	0.00833358	Putative nuclear protein, with 2 coiled coil-4 domains, of bilaterial origin(181.9 kD) [Caenorhabditis elegans]
	Xt4.1-TGas054a12.3	Xt_10001182	7.73372	0.000885638	neurocalcin delta [Homo sapiens]	Xt4.1-IMAGE:6981620.5	Xt_10006285	0.629291	0.000737306	zinc finger protein 432 [Homo sapiens]	Xt4.1-IMAGE:7021394.5	Xt_10000735	21.0854	0.00266967	protease, serine, 1 preproprotein; cationic trypsinogen; trypsinogen A;trypsinogen 1; trypsin 1; trypsin I [Homo sapiens]	Xt4.1-TGas046c16.5	Xt_10003521	0.640381	0.00423442	hypothetical protein LOC218811 [Mus musculus]
	TEgg021a14	Xt_10010570	7.13851	0.00119174		Xt4.1-TEgg041m17.3	Xt_10000055	0.619735	0.000747582		Xt4.1-IMAGE:7003590.5	Xt_10006365	19.835	0.00353001	protease, serine, 2 preproprotein; trypsinogen 2; anionic trypsinogen; trypsin2; trypsin II [Homo sapiens]	XtHex	Xt_10010688	0.634529	0.00448834
	Xt4.1-EC2BBA28AE08.5	Xt_10007677	6.51182	0.000985068	crystallin, mu; NADP-regulated thyroid-hormone binding protein [Homo sapiens]	Xt4.1-TGas121h01.3	Xt_10005951	0.613475	0.000463925	Non-Canonical UBiquitin Conjugating Enzyme 1 (NCUBE1) [Gallus gallus]	Xt4.1-TEgg038g02.3.5	Xt_10010181	18.2355	0.000491216	protein phosphatase 1 (39.5 kD) (XS238) [Caenorhabditis elegans]	Xt4.1-TEgg058b05.5.5	Xt_10009224	0.622708	0.00187912	far upstream element-binding protein; far upstream element binding protein;FUSE-binding protein [Homo sapiens]
	Xt4.1-TTpA002k24.5	Xt_10007064	6.03452	0.000870936		Xt4.1-TGas061g19.3	Xt_10007649	0.613146	0.00107477	polymerase (DNA directed), delta 3 [Mus musculus]	Xt4.1-TNeu113c03.3	Xt_10002060	17.5027	0.00144251		Xt4.1-TEgg030f22.3	Xt_10002812	0.621139	0.00187887	nGAP [Tetraodon nigroviridis]
	Xt4.1-TEgg065i06.3	Xt_10007610	5.98992	5.63329e-05		Xt4.1-TNeu124o06.3	Xt_10006180	0.612801	4.0034e-05		Xt4.1-TEgg012a03.3	Xt_10006999	16.6076	0.0011615	cyclin-dependent kinase	Xt4.1-IMAGE:6977272.3	Xt_10008019	0.620399	0.000574271	cornichon (16.8 kD) (5N661) [Caenorhabditis elegans]
	Xt4.1-TGas097b13.3	Xt_10006223	5.75191	5.05365e-06	cadherin 2, type 1 preproprotein; N-cadherin 1; cadherin 2, N-cadherin(neuronal); neural cadherin; calcium-dependent adhesion protein, neuronal [Homosapiens]	Xt4.1-TGas140a18.3	Xt_10001706	0.612441	0.00093925	hypothetical protein MGC2731 [Homo sapiens]	Xt4.1-TEgg047d24.3.5	Xt_10008839	13.4336	0.000627695	karyopherin alpha 2; RAG cohort 1; importin alpha 1 [Homo sapiens]	Xt4.1-TGas081k23.3	Xt_10000434	0.615913	0.0037497	hypothetical protein MGC5509 [Homo sapiens]
	Xt4.1-TNeu080p01.3.5	Xt_10009961	5.4655	0.0011007	tubulin, alpha 3; tubulin, alpha, brain-specific; hum-a-tub1; hum-a-tub2 [Homosapiens]	Xt4.1-TEgg058f01.3	Xt_10000110	0.612161	0.00114442	similar to autocrine motility factor receptor [Rattus norvegicus]	Xt4.1-IMAGE:6985522.5	Xt_10002346	12.059	0.0082462	chymotrypsinogen B1 [Homo sapiens]	Xt4.1-TEgg062h08.3	Xt_10007728	0.608956	0.00916991
	Xt4.1-TNeu121c02.3	Xt_10007830	4.97232	0.000249543	small nuclear RNA activating complex, polypeptide 3, 50kDa [Homo sapiens]	Xt4.1-EC2CAA10AH07.5	Xt_10007905	0.610816	0.000412149		Xt4.1-TGas119g06.3.5	Xt_10009924	7.87592	0.00159629	Vitellogenin A2 precursor (VTG A2) [Contains: Lipovitellin I; Lipovitellin II;Phosvitin; Phosvette I; Phosvette II]	Xt4.1-TTpA017e07.3	Xt_10003120	0.607199	0.00324853	Rho GTPase activating protein 12 [Homo sapiens]
	Xt4.1-TEgg011f02.5.5	Xt_10010409	4.43494	0.00112205		Xt4.1-TTpA018g09.5	Xt_10001525	0.606496	0.00113367	RNA-binding motif protein 16 [Homo sapiens]	Xt4.1-EC2BBA32AC12.5	Xt_10008519	6.942	0.00295605		Xt4.1-TEgg044j03.3	Xt_10001959	0.606722	0.0087146	NADPH-dependent FMN and FAD containing oxidoreductase [Homo sapiens]
	Xt4.1-TNeu091g06.3	Xt_10002336	4.41102	4.12139e-05	Ras-related associated with diabetes; RAS (RAD and GEM) like GTP binding 3 [Homosapiens]	Xt4.1-TGas094p18.3	Xt_10004689	0.602682	0.00048871	CG6509-PB [Drosophila melanogaster]	Xt4.1-NISC_no16a05.3	Xt_10005789	6.86251	0.000533591	Unknown (protein for MGC:75721) [Silurana tropicalis]	Xt4.1-TGas028p21.5	Xt_10006716	0.605316	0.0065174
	Xt4.1-TNeu118f16.3	Xt_10002714	4.32957	3.00146e-05		Xt4.1-TNeu092f08.3	Xt_10004112	0.59435	0.00115608		Xt4.1-NISC_no21g09.5	Xt_10006581	6.55322	0.00486783	protease, serine, 2 preproprotein; trypsinogen 2; anionic trypsinogen; trypsin2; trypsin II [Homo sapiens]	Xt4.1-TTpA011c02.5	Xt_10004975	0.604975	0.00438254
	er-alpha	Xt_10010664	4.23199	0.00113817		Xt4.1-TEgg064i24.3	Xt_10005149	0.587337	0.00116589	LD21546p [Drosophila melanogaster]	Xt4.1-TGas130o07.3.5	Xt_10008801	6.02944	0.00665888	hypothetical protein FLJ25795 [Homo sapiens]	Xt4.1-TGas112e20.5	Xt_10004725	0.593381	0.0085917	NEFA-interacting nuclear protein NIP30 [Homo sapiens]
	Xt4.1-TNeu093e11.3	Xt_10002259	4.18503	1.63266e-05	ENSANGP00000005322 [Anopheles gambiae]	Xt4.1-TNeu113a04.3	Xt_10006347	0.586975	0.000235137	exocyst complex 84-kDa subunit [Homo sapiens]	Xt4.1-TNeu028g12.5	Xt_10004020	5.70962	0.00166393	hypothetical protein A630041N19 [Mus musculus]	Xt4.1-TEgg007o02.3	Xt_10005247	0.587696	0.0090862
	Xt4.1-TTpA003j08.5.5	Xt_10008770	4.0955	0.000680031	Unknown (protein for MGC:53587) [Xenopus laevis]	Xt4.1-TTpA022i08.5.5	Xt_10009666	0.586522	0.00105013	CG4452-PA [Drosophila melanogaster]	Xt4.1-TGas138o08.3.5	Xt_10009059	5.62107	0.00167501	RAB6 interacting, kinesin-like (rabkinesin6) [Homo sapiens]	Xt4.1-TGas081m05.3	Xt_10004187	0.586605	0.00631524
	Xt4.1-TTpA022l10.3	Xt_10003076	4.03081	0.00122726	protein adaptor (44.2 kD) (XE768) [Caenorhabditis elegans]	Xt4.1-TGas061e24.3.5	Xt_10010116	0.584267	1.34102e-05	hypothetical protein FLJ20436 [Homo sapiens]	Xt4.1-TEgg016c07.3.5	Xt_10010234	5.26244	0.000322962	Mitogen-inducible gene 6 protein homolog (Mig-6) (Gene 33 polypeptide)	Xt4.1-TNeu051c01.3	Xt_10003184	0.575998	0.00151169
	Xt4.1-TNeu091k14.3	Xt_10001536	3.74763	0.000201119		Xtnr3-A	Xt_10010671	0.582941	0.000909692		Xt4.1-IMAGE:7006231.5	Xt_10002037	4.97898	0.00185424	elastase 1, pancreatic [Homo sapiens]	Xt4.1-TGas113i05.3	Xt_10003156	0.575231	0.0013551
	Xt4.1-TEgg071a22.3	Xt_10006012	3.30767	0.00118004	hypothetical protein FLJ32745 [Homo sapiens]	Xt4.1-TGas120l08.3.5	Xt_10010023	0.582008	0.000225176	Unknown (protein for MGC:75883) [Silurana tropicalis]	Xt4.1-TEgg061b10.3	Xt_10006374	4.65254	0.00621252		Xt4.1-TGas055j10.3	Xt_10004864	0.573303	0.00228053
	Xt4.1-TTpA018o07.5.5	Xt_10008727	3.1613	0.000108307	signal sequence receptor, alpha; TRAP alpha [Homo sapiens]	Xt4.1-EC0CBA005CA07.5	Xt_10010773	0.577454	0.000342475		Xt4.1-TGas125f10.3	Xt_10000662	4.18989	0.00191312	Similar to pre-B-cell colony-enhancing factor [Danio rerio]	Xt4.1-TNeu057d12.3	Xt_10001521	0.572658	0.000651576	CGI-141 protein [Homo sapiens]
	Xt4.1-TGas131j11.3	Xt_10001970	3.13182	0.000898908	aldehyde dehydrogenase-6 [Gallus gallus]	Xt4.1-EC2BBA24DD12.5	Xt_10004949	0.569272	0.000825287		Xt4.1-TNeu077n08.3	Xt_10007296	4.18301	0.000707624		Xt4.1-TNeu071e08.3	Xt_10002644	0.571877	0.00380719	Zinc finger, CW-type with coiled-coil domain 1; AC004542.C22.1 [Homo sapiens]
	XtSyntaxin-4	Xt_10010702	3.11837	0.000627768		Xt4.1-TGas131e13.3	Xt_10004513	0.567903	0.000763187	unnamed protein product [Mus musculus]	Xt4.1-TTpA049i14.3	Xt_10005944	3.86178	0.00903292		Xt4.1-TEgg113d07.5.5	Xt_10010381	0.57112	0.000761976	trinucleotide repeat containing 6; EDIE; GW182 autoantigen [Homo sapiens]
	Xt4.1-TGas107g21.3	Xt_10001522	3.01404	2.88827e-05	radial spokehead-like 1; ortholog of mouse radial spokehead-like 1 [Homosapiens]	Xt4.1-TNeu072h02.3	Xt_10006246	0.555099	0.000372477		Xt4.1-TEgg057h09.3	Xt_10000094	3.66978	0.000721391	Unknown (protein for MGC:66476) [Danio rerio]	Xt4.1-TNeu083l10.3	Xt_10005159	0.569501	0.00584339	hypothetical protein LOC162427 [Homo sapiens]
	Xt4.1-IMAGE:6998174.3.5	Xt_10010514	2.96508	0.000905206	RIKEN cDNA 1300017K07 [Mus musculus]	Xt4.1-TTpA046m01.5.5	Xt_10010430	0.555075	0.000121611	Xaa-Pro dipeptidase; prolidase; proline dipeptidase [Homo sapiens]	Xt4.1-TEgg040a04.3	Xt_10002496	3.47927	0.0043802	CG9636-PC [Drosophila melanogaster]	Xt4.1-TEgg004g24.3	Xt_10003550	0.56511	0.0035475
	Xt4.1-TTpA041b18.3.5	Xt_10010317	2.95241	2.36743e-05	structure specific recognition protein 1 [Homo sapiens]	Xt4.1-TNeu107l09.5	Xt_10007609	0.549268	0.000141899	protein similar to B-cell receptor-associated protein 31 (24.0 kD) (4D656)[Caenorhabditis elegans]	Xt4.1-TTpA076p09.5	Xt_10001346	3.38348	0.00272881		Xt4.1-EC0CBA003BF08.3	Xt_10008464	0.559852	0.00221286
	Xt4.1-TGas054o06.3	Xt_10007067	2.90975	0.00121219		Xt4.1-TTpA032b09.5.5	Xt_10009269	0.538697	0.000907682	glutathione peroxidase 1 [Homo sapiens]	Xt4.1-TEgg038p15.3	Xt_10010739	3.33562	0.00186395	wee1 tyrosine kinase; WEE1+ homolog (S. pombe); wee1-like protein kinase [Homosapiens]	Xt4.1-TEgg074c11.3	Xt_10000233	0.551686	0.00678068	human MUColipidosis related, Coelomocyte UPtake defective CUP-5 (75.9 kD)(cup-5) [Caenorhabditis elegans]
	Xt4.1-TEgg027g24.3	Xt_10002618	2.90157	0.00101369		Xt4.1-TGas119l16.3	Xt_10000287	0.506041	0.00108257	eNOS interacting protein (34.0 kD) (4I279) [Caenorhabditis elegans]	Xt4.1-TGas137l08.3.5	Xt_10010097	3.16394	0.00862114	similar to RIKEN cDNA 2810421I24 [Rattus norvegicus]	XtSyntaxin-4	Xt_10010702	0.550006	0.00858814
	Xt4.1-TGas120j19.3	Xt_10005916	2.84409	0.000559036	GATA binding protein 4; GATA-binding protein 4 [Homo sapiens]	Xt4.1-TNeu010l04.5	Xt_10004181	0.501674	0.000563897	hypothetical protein FLJ21827 [Homo sapiens]	Xt4.1-EC2BBA11DA04.3	Xt_10001559	2.97548	0.00227596	inosine triphosphatase; Inosine triphosphatase-A [Homo sapiens]	Xt4.1-TGas081o08.3	Xt_10003122	0.541725	0.000206574	Target of SBF; Tos8p [Saccharomyces cerevisiae]
	Xt4.1-TTpA023k06.5	Xt_10002503	2.7776	0.000808486		Xt4.1-TNeu105c06.5	Xt_10006784	0.493984	0.000836056	zyxin [Homo sapiens]	Xt4.1-TNeu114o12.3	Xt_10000541	2.80885	0.00639602		Xt4.1-TNeu108d19.3	Xt_10004000	0.539541	0.00273711	hypothetical protein FLJ20433 [Homo sapiens]
	Xt4.1-TEgg043o04.3	Xt_10001418	2.74215	0.000430984		Xt4.1-IMAGE:7017502.5	Xt_10002378	0.487224	0.000510301	solute carrier family 3 (activators of dibasic and neutral amino acidtransport), member 2; 4F2; 4T2HC; antigen identified by monoclonal antibodies4F2, TRA1.10, TROP4, and T43 [Homo sapiens]	Xt4.1-TGas016f10.5	Xt_10008368	2.79289	0.00404081		Xt4.1-TNeu069e24.3	Xt_10006238	0.5354	0.00216353	zinc finger protein 278 long A isoform; POZ-AT hook-zinc finger protein;MAZ-related factor; BTB-POZ domain zinc finger transcription factor [Homosapiens]
	Xt4.1-TTpA034f16.5	Xt_10002898	2.73181	0.00032208	dehydrogenase/reductase (SDR family) member 6; oxidoreductase UCPA [Homosapiens]	Xt4.1-EC2CAA2AD06.5	Xt_10004508	0.481962	0.000288819	lin-7 homolog C; LIN-7 protein 3 [Homo sapiens]	Xt4.1-TTpA013d11.3.5	Xt_10010041	2.66557	0.0025579	Unknown (protein for MGC:75714) [Silurana tropicalis]	Xt4.1-TEgg130d15.5	Xt_10005118	0.524122	0.00553868	chromosome 6 open reading frame 107; similar to CG31653-PA [Homo sapiens]
	Xt4.1-TNeu077f11.3	Xt_10004262	2.71327	0.000321281	ADP-RIBOSYLATION FACTOR 5	Xt4.1-TEgg045h20.3	Xt_10006091	0.479083	0.000359384	methylcrotonoyl-Coenzyme A carboxylase 2 (beta); non-biotin containing subunitof 3-methylcrotonyl-CoA carboxylase; biotin carboxylase [Homo sapiens]	Xt4.1-EC2CAA18DH02.5.5	Xt_10010224	2.62719	0.00634954		Xt4.1-TTpA012d18.5.5	Xt_10010109	0.519527	0.00574328	hypothetical protein dJ473B4 [Homo sapiens]
	Xt4.1-NISC_no05c08.5	Xt_10007713	2.67854	0.00016003		Xt4.1-TNeu087j22.3	Xt_10000348	0.47681	0.00123218		Xt4.1-TGas024e12.5	Xt_10004727	2.61995	0.00273115		Xt4.1-EC2CAA1AG10.3	Xt_10000765	0.516733	0.00859842	polyposis locus protein 1-like 1; likely ortholog of mouse polyposis locusprotein 1-like 1 [Homo sapiens]
	Xt4.1-TTpA034d14.3	Xt_10001276	2.63606	0.000125672	nuclear receptor co-repressor/HDAC3 complex subunit; TBL1-related protein 1[Homo sapiens]	Xt4.1-TGas081p16.5	Xt_10006637	0.46394	0.000235458		Xt4.1-TEgg026k13.3	Xt_10002863	2.61681	0.00399147		Xt4.1-TEgg074c10.3	Xt_10003524	0.50257	0.00263232	RIKEN cDNA 2900010J23 [Mus musculus]
	Xt4.1-TNeu104i12.3	Xt_10004372	2.59946	0.000370139	tolloid-like 1 [Homo sapiens]	Xt4.1-TEgg069e23.3	Xt_10001118	0.45931	0.000999421	CG7212-PA [Drosophila melanogaster]	Xt4.1-TGas095m20.3.5	Xt_10009844	2.61095	0.00186898	DEAD-box protein abstrakt; putative RNA helicase [Homo sapiens]	Xt4.1-TGas123h05.3	Xt_10000938	0.501858	0.00120737	hypothetical protein MGC1203 [Homo sapiens]
	Xt4.1-TEgg063n04.3	Xt_10007108	2.5894	0.00036743	peptidase E [Haemophilus influenzae Rd]	Xt4.1-TTpA069m23.3	Xt_10005735	0.457568	0.00122023		Xt4.1-TGas119m18.3	Xt_10000365	2.44893	0.00540161	CG6892-PA [Drosophila melanogaster]	Xt4.1-IMAGE:6982778.5	Xt_10004051	0.500583	0.00824332
	Xt4.1-TGas087k15.3	Xt_10000981	2.58874	0.000214852	RIKEN cDNA 2510038A11 [Mus musculus]	Xt4.1-TGas135k08.3	Xt_10002734	0.454057	1.56516e-05	ORF YKL201c [Saccharomyces cerevisiae]	Xt4.1-EC2BAA1BH09.5	Xt_10002554	2.44587	0.00485309		Xt4.1-TGas140a02.3	Xt_10007115	0.491018	0.00464634
	Xt4.1-IMAGE:7006201.5	Xt_10000614	2.58695	0.00051922	transmembrane 4 superfamily member 4; intestinal and liver (il) tetraspanmembrane protein [Homo sapiens]	Xt4.1-TEgg067d08.3	Xt_10007606	0.450977	0.000130128	Unknown (protein for MGC:75714) [Silurana tropicalis]	Xt4.1-TNeu084d09.3	Xt_10002958	2.43955	0.00160854	EMB-5, abnormal EMBryogenesis EMB-5 (175.8 kD) (emb-5) [Caenorhabditis elegans]	Xt4.1-TTpA064d22.5	Xt_10002448	0.483731	0.000269184	hypothetical protein FLJ12890 [Homo sapiens]
	Xt4.1-TTpA060o22.3	Xt_10002738	2.46971	0.000175562	tumor protein p53 binding protein, 2; apoptosis-stimulating protein of p53, 2[Homo sapiens]	Xt4.1-TEgg065h06.3	Xt_10001587	0.442032	0.000693696		Xt4.1-TNeu116p24.3	Xt_10004043	2.43562	0.00963208		Xt4.1-TNeu121k01.3	Xt_10006332	0.480139	0.00191614	hypothetical protein FLJ10210 [Homo sapiens]
	Xt4.1-TGas103k04.3	Xt_10004196	2.4194	9.22216e-05	alanyl-tRNA synthetase [Homo sapiens]	Xt4.1-TNeu121k21.5.5	Xt_10009203	0.440007	3.28674e-05	heat shock 70kDa protein 4 isoform a [Homo sapiens]	Xt4.1-TEgg069p12.3	Xt_10001870	2.40989	0.00249664	smooth muscle myosin phosphatase regulatory subunit homolog family member,Maternal Effect Lethal MEL-11 (110.6 kD) (mel-11) [Caenorhabditis elegans]	Xt4.1-TNeu025m07.5	Xt_10007354	0.469947	0.00792736	hypothetical protein FLJ20195 [Homo sapiens]
	Xt4.1-TTpA042j06.3.5	Xt_10009794	2.35617	3.57082e-05	regulator of G-protein signalling 2, 24kDa; G0 to G1 switch regulatory 8, 24kD;regulator of G-protein signalling 2, 24kD [Homo sapiens]	Xt4.1-TGas077d20.3	Xt_10005849	0.434832	0.000212231		Xt4.1-TNeu074n15.3.5	Xt_10009592	2.38699	0.00842888	SI:dZ25N23.2 (neurolin) [Danio rerio]	Xt4.1-TEgg012c22.3	Xt_10006341	0.456518	0.00325023
	Xt4.1-TTpA004o13.5	Xt_10000457	2.33577	1.74186e-05	stromal cell-derived factor 2 precursor [Homo sapiens]	Xt4.1-TTpA053f14.3	Xt_10001868	0.434075	0.00109268	probable protein kinase C-regulated chloride channel C07H4.2 - Caenorhabditiselegans	Xt4.1-TTpA053j04.3	Xt_10006895	2.38101	0.00215132		Xt4.1-EC2CAA18DA02.5	Xt_10008259	0.453851	0.00515832
	Xt4.1-TEgg060f10.3	Xt_10000717	2.31049	0.000180183	Unknown (protein for MGC:68765) [Xenopus laevis]	Xt4.1-TEgg045k21.3	Xt_10000225	0.432765	0.000129556	Ubl (ubiquitin-like protein)-specific protease 1; initially processes Smt3; alsoacts as a deconjugating enzyme for Smt3; Ulp1p [Saccharomyces cerevisiae]	Xt4.1-TEgg036e06.3	Xt_10000537	2.34012	0.00513391	T-cell, immune regulator 1, isoform a; ATPase, H+ transporting, 116kD; vacuolarproton translocating ATPase 116 kDa subunit A isoform 3; V-ATPase 116-kDaisoform a3; osteoclastic proton pump 116 kDa subunit; T cell immune responsecDNA7 protein; specifi	Xt4.1-TTpA055m13.3	Xt_10003074	0.44115	0.00145767	RNA helicase, putative [Arabidopsis thaliana]
	TNeu066o01	Xt_10010634	2.30804	0.000117895		Xt4.1-TNeu071i24.3.5	Xt_10009531	0.405263	0.000463416	midnolin [Mus musculus]	Xt4.1-EC2BBA11CF07.5	Xt_10005793	2.29382	0.000808093	cytochrome c oxidase subunit VIIc precursor; cytochrome-c oxidase chain VIIc[Homo sapiens]	Xt4.1-TEgg074p11.3	Xt_10003792	0.432529	0.00437785	transcriptional regulator ATRX isoform 3; human homolog of RAD54 (Saccharomycescerevisiae); DNA dependent ATPase and helicase; Zinc finger helicase; X-linkednuclear protein; helicase 2, X-linked [Homo sapiens]
	Xt4.1-IMAGE:7004850.5	Xt_10001758	2.26339	0.000825786	chromosome 16 open reading frame 5 [Homo sapiens]	Xt4.1-TNeu114n15.3	Xt_10000499	0.395686	0.00066227	DNA directed RNA polymerase II polypeptide C; polymerase (RNA) II (DNA directed)polypeptide C (33kD); RNA polymerase II subunit 3 [Homo sapiens]	Xt4.1-TNeu070l05.3	Xt_10001785	2.13484	0.00784373	ATP synthase, H+ transporting, mitochondrial F1 complex, O subunit (oligomycinsensitivity conferring protein); ATP synthase, H+ transporting, mitochondrial F1complex, O subunit; human ATP synthase OSCP subunit, oligomycin sensitivityconferring protei	Xt4.1-IMAGE:7023713.5	Xt_10005072	0.430303	0.00285277
	Xt4.1-TNeu132k12.3	Xt_10002674	2.2578	0.00104174	geal-6 membrane-associated high-copy suppressor 1; unc-50 related [Homo sapiens]	Xt4.1-TEgg101b06.5	Xt_10007730	0.395137	0.00100492	protein BM-009 (38.0 kD) (2H910) [Caenorhabditis elegans]	Xt4.1-IMAGE:6994394.5.5	Xt_10009668	2.1184	0.00429487	homeobox protein Meis2 isoform d; Meis (mouse) homolog 2; Meis1-related gene 1;TALE homeobox protein Meis2 [Homo sapiens]	Xt4.1-TNeu121b08.3	Xt_10007196	0.423943	0.00760237	Similar to chromosome 20 open reading frame 3 [Danio rerio]
	Xt4.1-TEgg016k14.3	Xt_10000835	2.18852	0.00114468		Xt4.1-TTpA034e10.5	Xt_10008529	0.384297	6.18747e-05	hypothetical protein FLJ21924 [Homo sapiens]	Xt4.1-TGas138j21.3	Xt_10003699	2.1109	0.0068354		Xt4.1-TTpA018g09.5	Xt_10001525	0.419679	0.00750095	RNA-binding motif protein 16 [Homo sapiens]
	Xt4.1-TEgg038g12.3.5	Xt_10010475	2.15503	0.000257789	carbohydrate (chondroitin) synthase 1; chondroitin synthase [Homo sapiens]	Xt4.1-TEgg043o14.3	Xt_10003880	0.361836	0.000268678	hypothetical protein MGC3035 [Homo sapiens]	Xt4.1-TTpA007e01.3	Xt_10005482	2.10426	0.00892375	Glutamate carboxypeptidase II (Membrane glutamate carboxypeptidase) (mGCP)(N-acetylated-alpha-linked acidic dipeptidase I) (NAALADase I)(Pteroylpoly-gamma-glutamate carboxypeptidase) (Folylpoly-gamma-glutamatecarboxypeptidase) (FGCP) (Folate hydrolas	Xt4.1-TGas052o11.3	Xt_10006085	0.404715	0.00803344	KARP-1-binding protein [Homo sapiens]
	Xt4.1-EC2CAA46CG03.3	Xt_10001855	2.14498	0.000706417	proteasome 26S non-ATPase subunit 7; Moloney leukemia virus-34 proviralintegration homolog; Mov34 protein homolog; proteasome subunit p40; 26Sproteasome regulatory subunit S12; 26S proteasome non-ATPase regulatory subunit7 [Homo sapiens]	Xt4.1-EC2BBA7CE05.5	Xt_10003949	0.346338	3.93259e-05	RAB39B, member RAS oncogene family [Homo sapiens]	Xt4.1-TGas121a07.3	Xt_10002300	2.09145	0.00904994	zinc finger (50.9 kD) (5A602) [Caenorhabditis elegans]	Xt4.1-EC2BBA23DC07.3	Xt_10004407	0.404349	0.00138128	hypothetical protein 9930016O13 [Mus musculus]
	Xt4.1-EC2BBA18DH09.3.5	Xt_10010452	2.11474	0.000487117		Xt4.1-TGas117e24.3.5	Xt_10009465	0.346334	0.00095127	nemo-like kinase [Homo sapiens]	Xt4.1-TGas132i08.3	Xt_10000490	2.06822	0.00741252		Xt4.1-TGas082b21.3	Xt_10006366	0.398052	0.00453731	ROD1 regulator of differentiation 1 [Mus musculus]
	Xt4.1-TNeu118g12.3	Xt_10004598	2.09872	0.00115573		Xt4.1-IMAGE:6992026.5.5	Xt_10009662	0.346118	9.30162e-05	82-kD FMRP Interacting Protein [Homo sapiens]	Xt4.1-TEgg026b01.3	Xt_10003274	2.05738	0.00691123		Xt4.1-TGas132n02.3	Xt_10008332	0.386433	0.00138208	HLA-B associated transcript 8 BAT8 isoform b; ankyrin repeat-containing protein;NG36 protein; G9A histone methyltransferase [Homo sapiens]
	Xt4.1-IMAGE:7004215.5	Xt_10001654	2.09859	0.00102491	eukaryotic translation elongation factor 1 beta 2; eukaryotic translationelongation factor 1 beta 1 [Homo sapiens]	Xt4.1-TEgg056b18.3.5	Xt_10008915	0.333151	0.000352138	phospholipid scramblase 1 family member (1M282) [Caenorhabditis elegans]	Xt4.1-TTpA046e12.5.5	Xt_10009042	2.04376	0.00368576	tyrosine 3/tryptophan 5 -monooxygenase activation protein, epsilon polypeptide;14-3-3 epsilon; mitochondrial import stimulation factor L subunit; proteinkinase C inhibitor protein-1 [Homo sapiens]	Xt4.1-TNeu106j24.3	Xt_10006353	0.364983	0.00230938
	Xt4.1-TGas081o02.3	Xt_10002780	2.0982	1.38236e-05	antiquitin; antiquitin 1; aldehyde dehydrogenase 7A1 [Homo sapiens]	Xt4.1-TGas081m05.3	Xt_10004187	0.322249	4.6913e-05		Xt4.1-TGas123m19.3	Xt_10000039	2.01113	0.00687815	ATP synthase, H+ transporting, mitochondrial F1 complex, gamma polypeptide 1;ATP synthase, H+ transporting, mitochondrial F1 complex, gamma polypeptide-like1 [Homo sapiens]	Xt4.1-TGas122g02.3	Xt_10000572	0.344713	0.00395059	Iroquois related homeobox 3 [Mus musculus]
	Xt4.1-EC2CAA1AG10.3	Xt_10000765	2.06191	0.000277418	polyposis locus protein 1-like 1; likely ortholog of mouse polyposis locusprotein 1-like 1 [Homo sapiens]	Xt4.1-TTpA016b07.5	Xt_10000485	0.309537	7.17268e-05		TGas071h24	Xt_10010605	1.96008	0.00850829		Xt4.1-IMAGE:6991616.5	Xt_10002366	0.339482	0.00479703	hypothetical protein FLJ38771 [Homo sapiens]
	Xt4.1-IMAGE:7007310.3.5	Xt_10009157	2.05649	0.000134398	zinc finger protein [Saccharomyces cerevisiae]	Xt4.1-TEgg008m05.3.5	Xt_10010220	0.297607	3.48488e-05	hypothetical protein FLJ33977 [Homo sapiens]	Xt4.1-TGas140m24.3	Xt_10007840	1.92794	0.00738183		Xt4.1-TGas092p09.3	Xt_10003954	0.325531	0.000928871	ubiquitous tetratricopeptide containing protein RoXaN; Rotavirus 'X' associatednon-structural protein [Homo sapiens]
	Xt4.1-TEgg077f02.3	Xt_10006818	2.05136	0.000163146		Xt4.1-TTpA009j06.5.5	Xt_10009210	0.291013	0.000749716	inhibitor of DNA binding 4, dominant negative helix-loop-helix protein;Inhibitor of DNA binding 4, dominant negative helix-loop-helix [Homo sapiens]	Xt4.1-IMAGE:6998773.3	Xt_10007074	1.91987	0.00436217	solute carrier family 7 (cationic amino acid transporter, y+ system), member 7[Homo sapiens]	Xt4.1-TEgg045f20.3	Xt_10000230	0.289125	0.00933388	hypothetical protein DKFZp686L1814 [Homo sapiens]
	Xt4.1-TEgg120o06.5.5	Xt_10009486	2.05133	0.000543639	CDC45-like; CDC45 (cell division cycle 45, S.cerevisiae, homolog)-like; celldivision cycle 45-like 2; CDC45-related protein [Homo sapiens]	Xt4.1-TEgg067a20.3.5	Xt_10009195	0.288662	1.20366e-05		Xt4.1-TTpA027d08.5.5	Xt_10009417	1.91881	0.00667319	hypoxia-inducible factor 1, alpha subunit isoform 1; ARNT interacting protein;member of PAS superfamily 1 [Homo sapiens]	Xt4.1-TGas131b11.3	Xt_10000653	0.28682	0.0075254	vertebrate transcription factor DP-Like, E2F/dimerisation partner, acts togetherwith LIN-35 Rb to antagonize Ras signaling (67.9 kD) (dpl-1) [Caenorhabditiselegans]
	Xt4.1-TNeu115b04.3	Xt_10006894	2.02422	0.000189885		Xt4.1-TEgg038j13.3.5	Xt_10009178	0.286442	5.41353e-05	diacylglycerol O-acyltransferase homolog 2; GS1999full [Homo sapiens]	Xt4.1-TTpA035i16.3	Xt_10002122	1.91778	0.000401226	diphosphoinositol polyphosphate phosphohydrolase; nudix (nucleotide diphosphatelinked moiety X)-type motif (1B849) [Caenorhabditis elegans]	Xt4.1-TGas141o12.3	Xt_10006004	0.264754	0.00144634
	Xt4.1-EC2BBA7AC08.5	Xt_10007927	2.01766	0.000699768	KIAA1018 protein [Homo sapiens]	Xt4.1-TGas102f19.3	Xt_10007372	0.283779	0.000275924	Bloom syndrome protein [Homo sapiens]	Xt4.1-TTpA007i05.3	Xt_10007042	1.87611	0.000274761	CG10763-PA [Drosophila melanogaster]	Xt4.1-TGas101m12.3	Xt_10005335	0.259481	0.00248936	Unknown (protein for MGC:56512) [Danio rerio]
	Xt4.1-TEgg074f01.3	Xt_10007462	2.00743	0.000475197		Xt4.1-TTpA045l09.5.5	Xt_10009169	0.270535	0.000262347	nuclear receptor coactivator 5; coactivator independent of AF-2 [Homo sapiens]	Xt4.1-TTpA034k03.3	Xt_10002361	1.85818	0.00559009		Xt4.1-TEgg050d12.3	Xt_10005808	0.251834	0.00491013
	Xt4.1-TTpA013d02.3.5	Xt_10008938	2.00578	0.000337579	COP9 signalosome subunit 6; MOV34 homolog, 34 kD [Homo sapiens]	Xt4.1-TTpA044m22.3	Xt_10002410	0.261444	0.000483048	Chain , Uridylate Kinase (E.C.2.7.4.-) Complexed With Two Adp Molecules	Xt4.1-EC2BAA1DD06.3	Xt_10000727	1.84812	0.000344458	RIKEN cDNA 1010001M04 [Mus musculus]	Xt4.1-TEgg046h12.3	Xt_10002825	0.233664	0.00508918
	Xt4.1-TEgg050f23.3	Xt_10006827	1.98095	3.08463e-05		Xt4.1-TNeu072a19.3	Xt_10002500	0.236544	0.00064029	hypothetical protein FLJ10466 [Homo sapiens]	Xt4.1-TNeu110n23.3	Xt_10006534	1.84605	0.00374359		Xt4.1-EC2BBA23CH07.3	Xt_10003320	0.229491	0.00645922
	Xt4.1-TNeu091o23.3.5	Xt_10008860	1.97909	0.000914884		Xt4.1-EC2BBA8DA09.5	Xt_10008156	0.230704	0.000114242	MondoA [Homo sapiens]	Xt4.1-TEgg036c20.3.5	Xt_10009344	1.81345	0.000680931	RIKEN cDNA 6530403D07 [Mus musculus]	Xt4.1-TEgg066h10.5	Xt_10004548	0.227656	0.0093797
	Xt4.1-IMAGE:6983425.3	Xt_10004404	1.97798	0.000249598	ADENYLATE KINASE ISOENZYME 1 (ATP-AMP TRANSPHOSPHORYLASE) (AK1) (MYOKINASE)	Xt4.1-EC2BBA29DB03.5	Xt_10006391	0.230695	0.000580445		Xt4.1-EC2CAA21CA06.5	Xt_10005762	1.79665	0.00241312	U6 snRNA-associated Sm-like protein LSm8 [Homo sapiens]	Xt4.1-TGas117l18.3	Xt_10003705	0.197884	0.00924552	E1A binding protein p300; p300; E1A-binding protein, 300kD [Homo sapiens]
	Xt4.1-TGas119a22.3.5	Xt_10010198	1.97264	0.00111518	Similar to signal transducing adaptor molecule (SH3 domain and ITAM motif) 1[Danio rerio]	Xt4.1-EC2CAA33AD07.5	Xt_10007109	0.229286	0.00036653	RNA polymerase I 16 kDa subunit [Homo sapiens]	Xt4.1-IMAGE:6984902.5	Xt_10005318	1.79458	0.00553263		Xt4.1-TEgg076f06.3	Xt_10010896	0.193638	0.000982942	Involved in tRNA biogenesis; Pus1p [Saccharomyces cerevisiae]
	Xt4.1-EC2BBA14AB11.5	Xt_10008269	1.95815	4.54908e-05		Xt4.1-EC2BBA8CG05.5	Xt_10008429	0.221922	0.000199077		Xt4.1-TEgg038c24.3.5	Xt_10009138	1.7894	0.00132443		Xt4.1-TGas040a23.5.5	Xt_10009527	0.189078	0.00995929	hypothetical protein FLJ20003 [Homo sapiens]
	Xt4.1-TGas095c23.3	Xt_10002412	1.94345	0.000941422	DEAD (Asp-Glu-Ala-Asp) box polypeptide 55 [Mus musculus]	Xt4.1-TNeu124m04.3	Xt_10000747	0.212676	0.000335978		Xt4.1-TGas089j19.3	Xt_10001039	1.78765	0.00970601	plasma glutathione peroxidase 3 precursor [Homo sapiens]	TEgg066p09	Xt_10010592	0.133715	0.000133576
	Xt4.1-EC2BBA21BD11.3	Xt_10007063	1.94035	0.00119829	propionyl Coenzyme A carboxylase, beta polypeptide [Homo sapiens]	Xt4.1-TNeu114o15.3	Xt_10000771	0.21158	0.000104893	similar to Hypothetical protein KIAA0056 [Rattus norvegicus]	Xt4.1-TNeu108n12.3.5	Xt_10008967	1.77849	0.00958813	tetraspan 3; tetraspanin TM4-A; tetraspan TM4SF; transmembrane 4 superfamily,member 8; tetraspanin 3 [Homo sapiens]	Xt4.1-EC2BBA28DH07.3	Xt_10004373	0.124455	0.00531662
	Xt4.1-TEgg051j08.3	Xt_10003545	1.93941	0.000367935	PROBABLY REMOVED OR REPLACED	Xt4.1-TTpA026i08.5	Xt_10001829	0.199515	5.14632e-05	lumican [Homo sapiens]	Xt4.1-TNeu067b16.3	Xt_10002706	1.77288	0.00262542	Cbl proto-oncogene protein [Xenopus laevis]	Xt4.1-TTpA028k17.5	Xt_10008342	0.117273	0.00725909
	TGas130e07	Xt_10010622	1.93602	5.20987e-05		Xt4.1-TEgg063g08.3	Xt_10007739	0.18737	6.94212e-05	EXCretory canal abnormal EXC-7, ELAV type RNA binding protein (48.7 kD) (exc-7)[Caenorhabditis elegans]	Xt4.1-TTpA029a15.3	Xt_10006488	1.74555	0.00923621		Xt4.1-IMAGE:7024628.5	Xt_10006570	0.112364	0.00365244
	Xt4.1-TGas081f15.3	Xt_10002193	1.92443	0.000701045	Unknown (protein for MGC:32701) [Homo sapiens]	Xt4.1-TEgg052j15.3	Xt_10003985	0.187319	7.51961e-05	pyridoxine 5'-phosphate oxidase [Homo sapiens]	Xt4.1-TEgg066f14.3	Xt_10001910	1.74411	0.00738687	geranylgeranyl diphosphate synthase 1 [Homo sapiens]	Xt4.1-TNeu107l11.3	Xt_10003366	0.0985483	0.00420278	retinoblastoma 1 (including osteosarcoma); Retinoblastoma-1 [Homo sapiens]
	Xt4.1-TNeu070h12.3	Xt_10000362	1.92144	0.000216393	Yeast Mitosis Arrest DeFicient-Like MDL-1 (30.7 kD) (mdl-1) [Caenorhabditiselegans]	Xt4.1-TTpA060b13.3	Xt_10008533	0.174535	6.15621e-06	ovary2	Xt4.1-TGas096o06.3	Xt_10000875	1.73857	0.00641188	glutathione-S-transferase like; glutathione transferase omega [Homo sapiens]	Xt4.1-TGas114d01.5	Xt_10007950	0.0866849	0.00211108
	Xt4.1-TGas116o21.3	Xt_10001925	1.91779	0.000562551		Xt4.1-TGas081b18.3.5	Xt_10009202	0.170741	8.61717e-06	downstream neighbor of SON isoform a; chromosome 21 open reading frame 60 [Homosapiens]	Xt4.1-TGas121m11.5.5	Xt_10009586	1.73287	0.00116077		Xt4.1-TTpA048b18.3	Xt_10002131	0.0787463	0.00920014
	Xt4.1-IMAGE:6977926.3.5	Xt_10008885	1.89653	8.66011e-05		Xt4.1-IMAGE:6987484.5.5	Xt_10009063	0.167131	0.000504672	zona pellucida glycoprotein 4 preproprotein; zona pellucida B protein [Homosapiens]	Xt4.1-TGas094b16.3	Xt_10001895	1.72691	0.002185	CGI-119 protein [Homo sapiens]	Xt4.1-NISC_ng26g07.3	Xt_10006687	0.0645249	0.00926316	Similar to rRNA methyltransferase (Caenorhabditis elegans) and hypothetical 28Kprotein (alkaline endoglucanase gene 5' region) from Bacillus sp.; Deg1p[Saccharomyces cerevisiae]
	Xt4.1-EC2BBA13DC08.5	Xt_10007225	1.89618	0.000195687		Xt4.1-TEgg049m02.3	Xt_10007041	0.155729	5.61023e-05		Xt4.1-TGas121l21.3	Xt_10000975	1.72193	0.00499264	DEAD (Asp-Glu-Ala-Asp) box polypeptide 52; DEAD/H (Asp-Glu-Ala-Asp/His) boxpolypeptide 52 [Mus musculus]	Xt4.1-TGas113f18.3	Xt_10006144	0.0580192	0.000739154
	Xt4.1-TGas098h12.3	Xt_10002196	1.87603	0.000286952	DnaJ (Hsp40) homolog, subfamily B, member 11; ER-associated DNAJ; ER-associatedHsp40 co-chaperone; hDj9; ERj3 [Homo sapiens]	Xt4.1-TEgg043n18.3	Xt_10003963	0.153605	0.000500968		Xt4.1-TNeu124h23.3	Xt_10005627	1.68981	0.00807106	testis specific protein 1; glyceraldehyde-3-phosphate dehydrogenase-like 5;cysteine-rich secretory protein-2 [Homo sapiens]	Xt4.1-TGas082h07.3.5	Xt_10009492	0.0397706	0.000149604	SH3-domain binding protein 4 [Homo sapiens]
	Xt4.1-EC2CAA4BE02.5	Xt_10004894	1.8759	0.000120273	fatty acid binding protein 4, adipocyte; A-FABP [Homo sapiens]	Xt4.1-TTpA069l15.3	Xt_10004524	0.141285	0.00046214		Xt4.1-EC2BBA15AB12.3	Xt_10007957	1.68793	0.00574331	Syntaxin 3 [Danio rerio]	Xt4.1-TEgg041p23.3	Xt_10000280	0.0284697	0.000172976	dead end protein [Homo sapiens]
	Xt4.1-TTpA008c07.5.5	Xt_10009076	1.85789	0.000312528	eukaryotic translation initiation factor 3, subunit 2 beta, 36kDa; eukaryotictranslation initiation factor 3, subunit 2 (beta, 36kD) [Homo sapiens]	Xt4.1-TEgg092i12.5	Xt_10003921	0.133668	2.55572e-05		Xt4.1-TTpA027g01.3	Xt_10004010	1.66945	0.0054803	Similar to neuroepithelial cell transforming gene 1 [Xenopus laevis]	Xt4.1-TEgg039f18.3.5	Xt_10009094	0.0229501	9.89756e-05	general transcription factor IIIA [Homo sapiens]
	Xt4.1-TEgg124a14.5	Xt_10006987	1.85134	0.000734829	nth endonuclease III-like 1 (E. coli); nth (E.coli endonuclease III)-like 1[Homo sapiens]	Xt4.1-TTpA055d04.3	Xt_10005446	0.118901	4.68047e-06		Xt4.1-TNeu092a10.3	Xt_10000315	1.66592	0.00331539	nuclear transcription factor-Y alpha [Rattus norvegicus]
	Xt4.1-TGas125f16.3.5	Xt_10009074	1.833	2.73632e-06	BAF53a; hArpN beta; actin-related protein; BAF complex 53 kDa subunit;BRG1-associated factor [Homo sapiens]	Xt4.1-TNeu072a13.3	Xt_10000376	0.118741	0.00103332		Xt4.1-TEgg069l05.3.5	Xt_10009061	1.65802	0.00316386	MAD2-like 1; MAD2 (mitotic arrest deficient, yeast, homolog)-like 1; mitoticarrest deficient, yeast, homolog-like 1 [Homo sapiens]
	Xt4.1-TGas143b12.3	Xt_10006280	1.82651	0.000722188		Xt4.1-TNeu065o07.3	Xt_10005655	0.112437	0.000478484		Xt4.1-TGas130m19.3	Xt_10000533	1.65382	0.00715404	hypothetical protein FLJ14117 [Homo sapiens]
	Xt4.1-IMAGE:6982420.3	Xt_10002364	1.82341	0.000834447	caspase 7 isoform alpha, large subunit; ICE-like apoptotic protease 3; apoptoticprotease MCH-3; Lice2 alpha/beta/gamma [Homo sapiens]	Xt4.1-TEgg039l06.3	Xt_10006513	0.0852697	2.2822e-05		Xt4.1-TEgg043m06.3	Xt_10000402	1.62314	0.00958865	hypothetical protein FLJ11305 [Homo sapiens]
	TNeu085h02	Xt_10010641	1.81217	8.38262e-05		Xt4.1-TGas071b09.5	Xt_10006312	0.0806216	0.000766747	homeotic protein ceh-6 - Caenorhabditis elegans (fragment)	Xt4.1-NISC_nl14a02.3	Xt_10007687	1.62113	0.00467645	CG2948-PA [Drosophila melanogaster]
	Xt4.1-TNeu083l10.3	Xt_10005159	1.80322	0.000110996	hypothetical protein LOC162427 [Homo sapiens]	Xt4.1-TNeu132a01.3	Xt_10006989	0.0604054	0.000557196		Xt4.1-IMAGE:7007446.5.5	Xt_10008878	1.6211	0.00939218	aldo-keto reductase family 1, member A1; aldehyde reductase; alcoholdehydrogenase [Homo sapiens]
	Xt4.1-TEgg041a05.3	Xt_10000080	1.79937	0.000606441	mitotic phosphoprotein 22 [Xenopus laevis]	Xt4.1-IMAGE:7005482.5.5	Xt_10009104	0.0564319	9.62609e-06	troponin T3, skeletal, fast; Troponin-T3, skeletal, fast [Homo sapiens]	Xt4.1-IMAGE:7022322.5	Xt_10007842	1.60691	0.00753499
	Xt4.1-IMAGE:6982139.5.5	Xt_10009577	1.79578	0.000591972	CGI-17 protein [Homo sapiens]	Xt4.1-TEgg035m23.3	Xt_10002478	0.0518213	1.72926e-05	Teratocarcinoma-derived growth factor 1 [Homo sapiens]	Xt4.1-TTpA024c19.3	Xt_10000442	1.56566	0.00867801	betaine aldehyde dehydrogenase
	Xt4.1-TTpA060o10.3	Xt_10008200	1.7865	0.000145372		Xt4.1-TEgg108o05.5	Xt_10004316	0.0510257	0.00108029	hypothetical protein FLJ36666 [Homo sapiens]	Xt4.1-TGas062k09.3	Xt_10003905	1.56233	0.00862093
	Xt4.1-EC2BBA8BF11.5	Xt_10003302	1.78439	0.0012499	peroxiredoxin 5 precursor isoform a; antioxidant enzyme B166; TPx type VI; livertissue 2D-page spot 71B; Alu co-repressor 1 [Homo sapiens]	Xt4.1-EC0CBA003BD05.3	Xt_10006099	0.0509777	0.000659875		Xt4.1-TGas131i20.5.5	Xt_10009697	1.56182	0.000537503	2,4-dienoyl CoA reductase 2, peroxisomal; peroxisomal 2,4-dienoyl-CoA reductase[Homo sapiens]
	Xt4.1-TGas113b02.3.5	Xt_10009941	1.76696	0.000358754		Xt4.1-TNeu077k09.3	Xt_10006554	0.044504	5.31488e-06		Xt4.1-TTpA064m16.5	Xt_10001408	1.56031	0.00914446	PDGFA associated protein 1; PDGF associated protein [Homo sapiens]
	Xt4.1-TTpA013e18.3	Xt_10006014	1.75783	0.00117809		Xt4.1-IMAGE:6995456.5.5	Xt_10010301	0.0411079	0.000235009	myogenic factor 3; myoblast determination protein 1 [Homo sapiens]	Xt4.1-TGas107a18.3.5	Xt_10009277	1.55966	0.00568371
	Xt4.1-TEgg070m19.3	Xt_10000931	1.7557	0.00109326		Xt4.1-TGas128f14.3	Xt_10007717	0.0219328	0.000148982		Xt4.1-TTpA069f14.5.5	Xt_10010440	1.55702	0.00235323	hypothetical protein DKFZp566I133 [Homo sapiens]
	Xt4.1-TEgg074e13.3	Xt_10000046	1.75528	0.00116855	hypothetical protein FLJ32942 [Homo sapiens]	Xt4.1-TGas091e08.3	Xt_10003069	0.0202247	0.000382741	SI:dZ234G15.1 (novel protein similar to KIAA1333) [Danio rerio]	Xt4.1-TGas064h04.3	Xt_10000112	1.5543	0.000102534	CDC37 homolog; CDC37 (cell division cycle 37, S. cerevisiae, homolog); CDC37 (S.cerevisiae) homolog [Homo sapiens]
	Xt4.1-TNeu123b16.3	Xt_10000939	1.74764	0.000448952	ATF4 [Gallus gallus]						Xt4.1-TTpA011b10.5	Xt_10000812	1.55192	0.00878805	calmodulin 1; phosphorylase kinase, delta subunit [Homo sapiens]
	Xt4.1-TNeu095i09.3	Xt_10002853	1.74348	0.000262401	adenylate kinase 7 [Homo sapiens]						Xt4.1-TEgg078n14.3	Xt_10004403	1.54939	0.00475986	cytochrome c oxidase subunit VIc proprotein; cytochrome c oxidase subunit VIcpreprotein [Homo sapiens]
	Xt4.1-TGas117m22.3	Xt_10006947	1.72859	0.000420095	CG5134 [Drosophila yakuba]						Xt4.1-TNeu123i19.3	Xt_10008154	1.54208	0.00932306
	Xt4.1-TGas120i19.3	Xt_10002334	1.72847	0.000530767	chromosome 6 open reading frame 28; U6 snRNA-associated Sm-like protein [Homosapiens]						Xt4.1-EC2CAA9DG05.5	Xt_10002530	1.5305	0.00423699	mitochondrial ribosomal protein L21 isoform d [Homo sapiens]
	Xt4.1-TNeu124b02.3.5	Xt_10010019	1.72646	0.00065181	NADH dehydrogenase (ubiquinone) Fe-S protein 2, 49kDa (NADH-coenzyme Qreductase); NADH-ubiquinone oxidoreductase Fe-S protein 2; NADH dehydrogenase(ubiquinone) Fe-S protein 2 (49kD) (NADH-coenzyme Q reductase) [Homo sapiens]						Xt4.1-TTpA025c01.3	Xt_10000671	1.52409	0.00631028	density-regulated protein; smooth muscle cell associated protein-3 [Homosapiens]
	Xt4.1-TGas091f07.3.5	Xt_10009763	1.71798	0.000156673	hypothetical protein 628 [Homo sapiens]						Xt4.1-EC2BBA13BD06.5	Xt_10005405	1.5181	0.00103981	hypothetical protein HSPC268 [Homo sapiens]
	Xt4.1-TNeu130g07.3	Xt_10003189	1.71606	0.00102766	prostatic binding protein; phosphatidylethanolamine binding protein [Homosapiens]						Xt4.1-TEgg079f17.5	Xt_10006215	1.51368	0.00903981
	Xt4.1-TTpA075f07.3	Xt_10008145	1.71333	0.000418387							Xt4.1-TGas086o02.3.5	Xt_10009095	1.51104	0.00417037	hypothetical protein FLJ20249 isoform 2 [Homo sapiens]
	Xt4.1-TGas125c24.3.5	Xt_10009037	1.69927	6.2624e-05	nei endonuclease VIII-like 1; endonuclease VIII [Homo sapiens]						Xtnr3-C	Xt_10010669	1.51067	0.00728707
	Xt4.1-TGas132g13.3	Xt_10001307	1.69637	0.000459353	tetratricopeptide repeat domain 1 [Homo sapiens]						Xt4.1-TEgg055j21.3	Xt_10001012	1.50013	0.0052989	Protein-tyrosine sulfotransferase A (Tyrosylprotein sulfotransferase-A) (TPST-A)
	Xt4.1-TGas046h03.5	Xt_10007723	1.69533	0.00106547	KIAA1145 protein [Homo sapiens]
	Xt4.1-TNeu091l05.3.5	Xt_10009638	1.69051	0.00111722	mitochondrial matrix processing protease, alpha subunit; inositolpolyphosphate-5-phosphatase, 72kDa [Homo sapiens]
	Xt4.1-TGas087m02.3	Xt_10002141	1.68212	0.00109137
	Xt4.1-TTpA041h10.3	Xt_10001576	1.67859	0.000195924	sulfotransferase family, cytosolic, 1A, phenol-preferring, member 2;thermostable phenol sulfotransferase; phenolic-metabolizing (P) form of PST;arylamine sulfotransferase; aryl sulfotransferase; phenol-preferring phenolsulfotransferase2; phenol-sulfa
	Xt4.1-TEgg049k01.3	Xt_10000879	1.66239	0.000981829	small membrane protein 1 [Homo sapiens]
	Xt4.1-IMAGE:6998221.5	Xt_10003513	1.65357	0.000965409
	Xt4.1-TEgg021e10.3.5	Xt_10009642	1.64942	0.000126455	Drosophila discs large-1 tumor supressor-like; hepatoma up-regulated [Homosapiens]
	Xt4.1-TTpA010p23.5.5	Xt_10009983	1.6255	0.000680876	similar to putative transmembrane protein; homolog of yeast Golgi membraneprotein Yif1p (Yip1p-interacting factor) [Homo sapiens]
	Xt4.1-TGas089a01.5	Xt_10004657	1.62519	0.000964713	selenoprotein W, 1; selW [Homo sapiens]
	Xt4.1-IMAGE:6989050.5	Xt_10002781	1.62409	0.000284195
	Xt4.1-TTpA014a22.5	Xt_10000955	1.61474	0.00032388	leptin receptor overlapping transcript-like 1; leptin receptor overlappingtranscript-like 1; MY047 protein [Homo sapiens]
	Xt4.1-TNeu069p14.3	Xt_10002191	1.60268	0.00049858	HSPC059 protein [Homo sapiens]
	Xt4.1-TEgg078n14.3	Xt_10004403	1.59202	0.0010036	cytochrome c oxidase subunit VIc proprotein; cytochrome c oxidase subunit VIcpreprotein [Homo sapiens]
	Xt4.1-TEgg118f23.5.5	Xt_10009656	1.57474	0.000515217	hypothetical protein FLJ20584 [Homo sapiens]
	Xt4.1-TEgg049b14.3	Xt_10000573	1.56226	6.57061e-06
	Xt4.1-TTpA041k23.3.5	Xt_10009108	1.56099	0.000784281	alpha 1 type II collagen isoform 1; collagen II, alpha-1 polypeptide; cartilagecollagen; chondrocalcin, included; COL11A3, formerly [Homo sapiens]
	Xt4.1-TTpA043f24.5.5	Xt_10009835	1.56004	0.0012283	translocating chain-associating membrane protein; translocating chain-ssociatingmembrane protein [Homo sapiens]
	Xt4.1-TEgg065p16.3	Xt_10000570	1.55805	0.000158898	Zinc-regulated DNA binding protein involved in zinc ion homeostasis; Zap1p[Saccharomyces cerevisiae]
	Xt4.1-TTpA012b04.5.5	Xt_10009267	1.55626	0.000828439	type I transmembrane protein, component of COPII-coated, ER-derived transportvesicles; Emp24p [Saccharomyces cerevisiae]
	Xt4.1-TEgg122h18.5	Xt_10005092	1.55288	0.000434983
	Xt4.1-IMAGE:6985592.5	Xt_10003080	1.55121	0.000970484	succinate dehydrogenase complex, subunit B, iron sulfur (Ip); iron-sulfursubunit [Homo sapiens]
	Xt4.1-TTpA047h07.3	Xt_10006081	1.54418	0.00021588
	Xt4.1-EC2BBA26DH10.3.5	Xt_10009387	1.54119	0.000754154
	Xt4.1-TEgg061c21.3	Xt_10003828	1.5273	1.28344e-05
	Xt4.1-TGas127d08.3.5	Xt_10008659	1.52075	1.65714e-16	transmembrane trafficking protein [Homo sapiens]
	Xt4.1-TTpA032d08.5	Xt_10005520	1.52023	0.00113779
	p3B-alpha	Xt_10010665	1.51874	0.000493423
	Xt4.1-TTpA024n18.3	Xt_10000928	1.51576	0.00125261
26 oC	Xt4.1-IMAGE:7004129.5	0.00459925	58.5279	Xt_10007227	Preprocaerulein type III precursor	Xt4.1-EC2BBA11CA07.3.5	Xt_10010160	0.663815	0.00662008	vacuolar protein sorting 29 isoform 1; vacuolar sorting protein VPS29/PEP11;vacuolar protein sorting 29 (yeast homolog); retromer protein; x 007 protein[Homo sapiens]	Xt4.1-TEgg020d20.3	6.0082e-06	51.0009	Xt_10002900	hypothetical protein MGC4238 [Homo sapiens]	Xt4.1-EC2BBA35BD11.3	0.00306813	0.66468	Xt_10003253	similar to RIKEN cDNA 5630401J11 [Homo sapiens]
	Xt4.1-TGas131p03.5	0.00300191	24.4858	Xt_10006118	sacm21 (76.4 kD) (XI185) [Caenorhabditis elegans]	Xt4.1-TGas140h21.3	Xt_10001332	0.661299	0.00973435		Xt4.1-TEgg065c11.3	0.000191494	42.1157	Xt_10000791		Xt4.1-TTpA003e07.5.5	0.00112257	0.664024	Xt_10008914	fast skeletal myosin alkali light chain 1 isoform 1f; A1 catalytic; A2 catalytic[Homo sapiens]
	Xt4.1-EC2CAA25BG05.5.5	0.00740847	15.3259	Xt_10009696	folate hydrolase (prostate-specific membrane antigen) 1; folate hydrolase 1(prostate-specific membrane antigen); glutamate carboxylase II [Homo sapiens]	Xt4.1-TNeu124o16.3.5	Xt_10009400	0.661066	0.00515047	frizzled 7; frizzled (Drosophila) homolog 7; Frizzled, drosophila, homolog of, 7[Homo sapiens]	Xt4.1-TEgg069b08.5.5	0.000527831	12.7569	Xt_10010263	hypothetical protein FLJ10936 [Homo sapiens]	Xt4.1-IMAGE:6991372.5	0.0029842	0.65832	Xt_10007384
	Xt4.1-TGas104f10.3	0.00760826	12.5657	Xt_10006630		Xt4.1-EC2CAA39AA01.5	Xt_10004454	0.658104	0.00479924	expressed protein [Arabidopsis thaliana]	Xt4.1-TTpA077b10.3	0.00104059	9.01861	Xt_10010799		Xt4.1-TTpA028p13.5	0.000332359	0.658235	Xt_10000744	phosphogluconate dehydrogenase; 6-phosphogluconate dehydrogenase [Homo sapiens]
	Xt4.1-TEgg058h14.3	0.00390162	8.54285	Xt_10004520	bromodomain containing protein 2; female sterile homeotic-related gene 1 [Homosapiens]	Xt4.1-TEgg045p06.3	Xt_10001677	0.657106	0.00958486	Unknown (protein for MGC:63487) [Danio rerio]	Xt4.1-TNeu093e11.3	0.00108737	8.13509	Xt_10002259	ENSANGP00000005322 [Anopheles gambiae]	Xt4.1-TGas089p08.3	5.44824e-05	0.658023	Xt_10000956	yeast Glc Seven-like Phosphatase, putative serine/threonine protein phosphatase1, catalytic subunit, Drosophila flap wing homologue, expressed in overlap withkinesin-associated protein, glutamate-gated chloride channel (76.9 kD)(gsp-2ANDkap-1) [Caeno
	Xt4.1-TGas124g09.3.5	0.00038045	6.95848	Xt_10009075	D123 gene product [Homo sapiens]	Xt4.1-TNeu132k12.3	Xt_10002674	0.656653	0.00650229	geal-6 membrane-associated high-copy suppressor 1; unc-50 related [Homo sapiens]	Xt4.1-TNeu116p24.3	0.000282509	7.99765	Xt_10004043		TEgg048j18	0.00273298	0.653944	Xt_10010580
	Xt4.1-TNeu117k10.3	0.00315464	5.80793	Xt_10003380	C. elegans EAT-1 protein (corresponding sequence T11B7.4b) [Caenorhabditiselegans]	Xt4.1-TTpA048g22.3	Xt_10002976	0.651834	0.00782941		Xt4.1-TGas113n17.5	0.00175442	6.88582	Xt_10006639		Xt4.1-IMAGE:6978005.5	0.00236628	0.653425	Xt_10002342	myeloid leukemia factor 2 [Homo sapiens]
	Xt4.1-TNeu131h24.3	0.00210308	5.2893	Xt_10006155		Xt4.1-TGas060o17.3	Xt_10005294	0.643496	0.0098999	cell division cycle 2-like 1 (PITSLRE proteins); Cell division cycle 2-like 1;PITSLRE protein kinase alpha; p58/GTA protein kinase; galactosyltransferaseassociated protein kinase [Homo sapiens]	Xt4.1-TNeu125o18.3	0.00142252	6.26354	Xt_10005680	Unknown (protein for MGC:63958) [Danio rerio]	Xt4.1-TEgg052m04.3	0.000918135	0.630182	Xt_10002648	Rho GDP dissociation inhibitor with activity toward Rho1p; Rdi1p [Saccharomycescerevisiae]
	Xt4.1-TTpA004o20.5.5	0.001904	4.83714	Xt_10009594	solute carrier family 25 (mitochondrial carrier; dicarboxylate transporter),member 10; dicarboxylate ion carrier [Homo sapiens]	Xt4.1-EC2BBA11AA11.3	Xt_10003411	0.642543	0.0085348		Xt4.1-TNeu099e11.3	6.10379e-05	5.307	Xt_10007351		Xt4.1-EC2CAA46CG05.5	0.000645007	0.628562	Xt_10001976	RIKEN cDNA B930008I02 gene [Mus musculus]
	Xt4.1-TNeu122j10.3	0.0031629	4.21144	Xt_10010825		Xt4.1-IMAGE:6992541.5.5	Xt_10008904	0.640928	0.00290709	cytokine-inducible kinase; proliferation-related kinase; polo-like kinase 3[Homo sapiens]	Xt4.1-TNeu097d01.3	0.000588002	4.192	Xt_10004323	hypothetical protein FLJ20533 [Homo sapiens]	Xt4.1-TGas130g18.3	0.00230537	0.628036	Xt_10000963	Golgi coiled-coil protein 1; Golgi coiled coil protein 1; peripheral membraneGolgi protein [Homo sapiens]
	Xt4.1-TEgg054g09.3	0.00424814	3.9705	Xt_10002326	eukaryotic translation initiation factor 2B, subunit 5 epsilon, 82kDa;eukaryotic translation initiation factor 2B, subunit 5 (epsilon, 82kD) [Homosapiens]	Xt4.1-TEgg048m16.3	Xt_10005142	0.640814	0.000301399	lysosomal-associated membrane protein 2 [Rattus norvegicus]	Xt4.1-TTpA065h05.3	0.00338994	3.49647	Xt_10008478	KIAA0133 gene product [Homo sapiens]	Xt4.1-TGas096d18.3	0.00267949	0.623867	Xt_10001953	methionine-tRNA synthetase; methionine tRNA ligase; methionyl-tRNA synthetase[Homo sapiens]
	Xt4.1-TEgg036b19.3	0.00712597	3.76318	Xt_10003495		Xt4.1-TTpA046e04.3.5	Xt_10008647	0.635777	0.00835232	carnitine/acylcarnitine translocase; Carnitine-acylcarnitine translocase;carnitine-acylcarnitine carrier [Homo sapiens]	Xt4.1-TEgg032b21.3	0.00183693	3.38044	Xt_10008400	similar to protein kinase, lysine deficient 1; kinase deficient protein [Rattusnorvegicus]	Xt4.1-hn-RNP-A0.5.5	0.00302539	0.62337	Xt_10008645	heterogeneous nuclear ribonucleoprotein A0; hnRNA binding protein [Homo sapiens]
	Xt4.1-TTpA021d05.3	0.00321069	3.60642	Xt_10005946		Xt4.1-TNeu108o07.3	Xt_10000710	0.633339	0.0076051	myosin, heavy polypeptide 9, non-muscle [Homo sapiens]	Xt4.1-IMAGE:6981826.5	0.000904051	3.37196	Xt_10002736	GABA(A) receptor-associated protein; GABA(A)-receptor-associated protein [Homosapiens]	Xt4.1-EC2BBA12DG01.3	0.0016169	0.619573	Xt_10001906	eukaryotic translation elongation factor 1 alpha 2; elongation factor-1 alpha;Statin S1; elongation factor 1-alpha 2 [Homo sapiens]
	Xt4.1-TEgg007d05.3	0.00395535	3.42361	Xt_10005175		Xt4.1-TGas132e22.3	Xt_10001876	0.6184	0.0018802	sorcin; Sorcin (class 4 gene) [Homo sapiens]	Xt4.1-EC2BBA28DE06.5	0.000677476	3.23564	Xt_10006904		Xt4.1-NISC_nl10h07.5	0.000678639	0.614318	Xt_10006000	gamma adducin [Gallus gallus]
	Xt4.1-TNeu097j03.3	0.00586703	3.01084	Xt_10003079	epithelial membrane protein 2 [Homo sapiens]	Xt4.1-TEgg140a23.5.5	Xt_10009852	0.618262	0.00929181	CDC7-like 1; CDC7 (cell division cycle 7, S. cerevisiae, homolog)-like 1; Celldivision cycle 7, S. Cerevisiae, homolog-like 1 [Homo sapiens]	Xt4.1-TTpA033e13.3	0.00190283	2.9187	Xt_10002668	ribosomal protein L22 proprotein; 60S ribosomal protein L22;Epstein-Barr-encoded RNA-associated protein; Epstein-Barr virus smallRNA-associated protein; EBER-associated protein; heparin-binding protein 15;heparin-binding protein HBp15 [Homo sapiens]	Xt4.1-TGas116d07.3	0.000126123	0.606374	Xt_10006234
	Xt4.1-TNeu106n02.3	0.00835123	2.80912	Xt_10004237	UDP-Gal:betaGlcNAc beta 1,3-galactosyltransferase 2; beta-3-galt2 [Homo sapiens]	Xt4.1-TNeu104e06.3	Xt_10000995	0.61381	0.00407304	hypothetical protein MGC52117 [Homo sapiens]	Xt4.1-IMAGE:7007271.3.5	5.979e-05	2.60868	Xt_10009567		Xt4.1-TGas003k20.5	0.00203816	0.60539	Xt_10004393
	Xt4.1-TGas081n21.3	0.00136436	2.78305	Xt_10007727		Xt4.1-TEgg044h09.5	Xt_10005120	0.612326	0.00861633		Xt4.1-TGas144i12.3.5	0.00228984	2.6035	Xt_10009135	VENT-like homeobox 2; hemopoietic progenitor homeobox protein VENTX2 [Homosapiens]	Xt4.1-TEgg010k10.3	0.00291523	0.602892	Xt_10006067	ENSANGP00000020507 [Anopheles gambiae]
	Xt4.1-TNeu073b15.3	0.000802332	2.57985	Xt_10007775		Xt4.1-TGas059o04.3	Xt_10001336	0.61188	0.00986853	complement component factor B [Danio rerio]	Xt4.1-TEgg006d05.3	0.00252935	2.51146	Xt_10004903		Xt4.1-TNeu066d14.3	0.00303972	0.595379	Xt_10005425	cubilin; intrinsic factor-cobalamin receptor; intrinsic factor B12-receptor[Homo sapiens]
	Xt4.1-TEgg011o22.3	0.00356664	2.54285	Xt_10006258	Unknown (protein for MGC:76203) [Silurana tropicalis]	Xt4.1-IMAGE:6995179.5.5	Xt_10008706	0.610765	0.00243205	proteasome 26S ATPase subunit 3; human immunodeficiency virus tat transactivatorbinding protein-1; Tat-binding protein 1; proteasome subunit P50 [Homo sapiens]	Xt4.1-EC2CAA10DC03.5	0.00220905	2.37139	Xt_10006150		Xt4.1-IMAGE:6977562.5	0.00265534	0.59131	Xt_10003755	protein kinase C binding protein 1 isoform a; cutaneous T-cell lymphomaassociated antigen se14-3; CTCL tumor antigen se14-3; zinc finger MYND domaincontaining protein 8 [Homo sapiens]
	Xt4.1-TEgg075n14.3	0.0018012	2.52899	Xt_10003474		Xt4.1-TEgg058n16.3	Xt_10001768	0.608312	0.00932551	hypothetical protein FLJ11712 [Homo sapiens]	Xt4.1-TEgg054n08.3.5	0.00161962	2.30102	Xt_10010494		Xt4.1-TNeu119l04.3.5	0.0032715	0.591107	Xt_10009427
	Xt4.1-EC2BBA30AB12.5	0.000658392	2.52679	Xt_10006495	cystatin C precursor; cystatin 3; gamma-trace; post-gamma-globulin;neuroendocrine basic polypeptide [Homo sapiens]	Xt4.1-TNeu072o05.3	Xt_10007511	0.605448	0.00985201	DNA directed RNA polymerase II polypeptide A; polymerase (RNA) II (DNA directed)polypeptide A (220kD); DNA-directed RNA polymerase II largest subunit, RNApolymerase II 220 kd subunit [Homo sapiens]	Xt4.1-TGas092c13.3	0.000347165	2.28677	Xt_10005842		Xt4.1-TEgg040a04.3	0.000697969	0.583517	Xt_10002496	CG9636-PC [Drosophila melanogaster]
	Xt4.1-EC0CBA004CH11.3	0.000275452	2.50601	Xt_10008531		Xt4.1-TNeu101m19.5	Xt_10005608	0.60425	0.00726343	nuclear matrix protein p84 [Homo sapiens]	Xt4.1-TGas127m13.5	0.0022743	2.26882	Xt_10006354	zinc finger protein 84 (HPF2) [Homo sapiens]	Xt4.1-TEgg002n17.3	0.000402979	0.582248	Xt_10004902	CG7082-PC [Drosophila melanogaster]
	Xt4.1-TTpA033b12.5	0.00822477	2.48007	Xt_10000821	ATPase, H+ transporting, lysosomal, V1 subunit G3, isoform a; vacuolar protonpump, subunit G3; V-ATPase G3 subunit; vacuolar ATP synthase subunit G 3;V-ATPase G subunit 3; vacuolar proton pump G subunit 3; V-ATPase 13 kDa subunit3; ATPase, H+ transpo	Xt4.1-TGas140h24.3	Xt_10002531	0.594778	0.00561575	DEAD (Asp-Glu-Ala-Asp) box polypeptide 20; DEAD-box protein DP103;SMN-interacting protein [Homo sapiens]	Xt4.1-TGas069k17.3.5	0.000613078	2.2363	Xt_10009282	hypothetical protein LOC221143 [Homo sapiens]	Xt4.1-TTpA033l21.5.5	0.00175327	0.578886	Xt_10010157	HMT1 hnRNP methyltransferase-like 2 isoform 2; protein arginineN-methyltransferase 1; interferon receptor 1-bound protein 4 [Homo sapiens]
	Xt4.1-TTpA077n12.3	0.00138809	2.38531	Xt_10000469	similar to tRNA synthetase class II [Homo sapiens]	Xt4.1-TNeu086e20.5	Xt_10005837	0.580021	0.000442734	hypothetical protein XP_166659 [Homo sapiens]	Xt4.1-IMAGE:7004215.5	0.000222211	2.22727	Xt_10001654	eukaryotic translation elongation factor 1 beta 2; eukaryotic translationelongation factor 1 beta 1 [Homo sapiens]	Xt4.1-TTpA031h08.5.5	0.001383	0.578805	Xt_10010362	lactate dehydrogenase A [Homo sapiens]
	TNeu085h02	0.000304865	2.36637	Xt_10010641		Xt4.1-TEgg019p15.3	Xt_10002397	0.558068	0.00472709	likely ortholog of yeast ARV1 [Homo sapiens]	Xt4.1-TEgg076j22.5.5	7.06377e-05	2.18482	Xt_10009610	RIKEN cDNA 3110023B02 [Mus musculus]	Xt4.1-TEgg074c01.3.5	0.00223686	0.573532	Xt_10010299	solute carrier family 39 (zinc transporter), member 1; zinc-iron regulatedtransporter-like gene; solute carrier family 39 (zinc transporter), member 3;zinc/iron regulated transporter-like [Homo sapiens]
	Xt4.1-TGas029c09.5	0.00696211	2.29597	Xt_10005325		Xt4.1-TNeu089d16.3	Xt_10000489	0.555951	0.000361394	CG2905-PA [Drosophila melanogaster]	Xt4.1-NISC_ng04b10.3	5.2422e-05	2.16557	Xt_10007399	unnamed protein product [Mus musculus]	Xt4.1-TTpA022p22.3	0.000749224	0.569117	Xt_10001192	mitochondrial glutamate carrier 1 [Homo sapiens]
	Xt4.1-TEgg040h12.3	0.00164522	2.10046	Xt_10004347	cisplatin resistance-associated overexpressed protein [Homo sapiens]	TNeu066o01	Xt_10010634	0.544739	0.00123395		Xt4.1-TNeu104p07.3	0.00336648	2.09272	Xt_10000497	putative receptor protein [Homo sapiens]	Xt4.1-TTpA052i01.3	0.00239007	0.567172	Xt_10008110	SAM and SH3 domains containing protein 1 (Proline-glutamate repeat-containingprotein)
	Xt4.1-TNeu105b02.3	0.00169829	2.09963	Xt_10008102	hypothetical protein FLJ30596 [Homo sapiens]	Xt4.1-IMAGE:6992541.3	Xt_10007101	0.542839	0.0067291		Xt4.1-TTpA028a04.3	0.00154968	2.01474	Xt_10004013	Brain Modulosignalin Homolog; Bmh2p [Saccharomyces cerevisiae]	Xt4.1-TGas086j01.3	0.00176611	0.566578	Xt_10000047	DnaJ (Hsp40) homolog, subfamily A, member 3; tumorous imaginal discs(Drosophila) homolog [Homo sapiens]
	Xt4.1-TEgg013j05.3	0.00605381	2.07958	Xt_10007751		Xt4.1-TEgg056k12.3	Xt_10005124	0.542696	0.00463397		Xt4.1-EC2BBA9BH08.5	0.000220441	2.0113	Xt_10007401		Xt4.1-TGas112e20.5	0.000205306	0.561551	Xt_10004725	NEFA-interacting nuclear protein NIP30 [Homo sapiens]
	Xt4.1-IMAGE:6994302.5.5	0.00198683	2.06447	Xt_10010032	exosome complex exonuclease RRP41; exosome component Rrp41; ribosomalRNA-processing protein 41 [Homo sapiens]	Xt4.1-TTpA019d07.3	Xt_10007860	0.540556	0.00356755	homeo box D3; homeobox protein Hox-D3; Hox-4.1, mouse, homolog of; homeodomainprotein [Homo sapiens]	Xt4.1-TGas121c24.3	5.05544e-06	1.98068	Xt_10008020	CTX	Xt4.1-EC2BBA13BG11.5	0.00124884	0.561441	Xt_10003400	mitochondrial ribosomal protein L28; melanoma antigen p15; melanoma-associatedantigen recognised by cytotoxic T lymphocytes [Homo sapiens]
	Xt4.1-TGas121n13.5	0.00684401	2.05831	Xt_10007861	hypothetical protein FLJ13590 [Homo sapiens]	Xt4.1-TGas143i03.3	Xt_10002655	0.539398	0.0033195	CDC16 homolog; cell division cycle 16; anaphase-promoting complex, subunit 6[Homo sapiens]	Xt4.1-TGas130k23.3	0.00133482	1.97112	Xt_10005969		Xt4.1-TEgg072h10.3	0.00184463	0.557772	Xt_10005733	Tetraspanin 97E CG6323-PA [Drosophila melanogaster]
	Xt4.1-TEgg045j11.3	0.00491162	2.04445	Xt_10003879	cysteine-rich, angiogenic inducer, 61; cysteine-rich heparin-binding protein 61;cysteine-rich, anigogenic inducer, 61 [Homo sapiens]	Xt4.1-IMAGE:7007026.3	Xt_10001661	0.538307	0.00614651		Xt4.1-IMAGE:6977426.3	0.000585326	1.90974	Xt_10005477	Kell blood group precursor (McLeod phenotype) [Homo sapiens]	Xt4.1-TEgg044l09.3	0.00255482	0.554103	Xt_10006065
	Xt4.1-TEgg005n06.3	0.00577704	2.03782	Xt_10007275	SLIT-ROBO Rho GTPase-activating protein 2; SLIT-ROBO Rho GTPase-activatingprotein 3; WAVE-associated Rac GTPase activating protein [Homo sapiens]	cad2	Xt_10010674	0.537918	0.00724272		Xt4.1-EC2BBA11CD05.5.5	1.67931e-05	1.87944	Xt_10009643		Xt4.1-IMAGE:6995073.5	0.00149202	0.551878	Xt_10006278	dynamin 2; Dynamin II [Homo sapiens]
	Xt4.1-EC2BBA18CF07.3	0.00420788	2.03772	Xt_10004509		Xt4.1-TNeu097i19.3.5	Xt_10008777	0.53325	0.00944328	B-cell translocation gene 3; abundant in neuroepithelium area [Homo sapiens]	Xt4.1-IMAGE:6976721.5.5	0.000171201	1.85959	Xt_10009562	uroplakin 1A [Homo sapiens]	Xt4.1-TNeu072p16.3	0.0028143	0.551581	Xt_10005468
	Xt4.1-TGas019p23.5	0.00152848	2.03187	Xt_10004948	Unknown (protein for MGC:68729) [Xenopus laevis]	Xt4.1-NISC_no06h03.5	Xt_10005174	0.531676	0.00783497		Xt4.1-TTpA016f19.3	0.00301692	1.82748	Xt_10004143		Xt4.1-TNeu080p20.3	0.00113247	0.546968	Xt_10002805	similar to RIKEN cDNA 5830457O10 [Rattus norvegicus]
	Xt4.1-TGas105a07.3	3.57297e-06	2.00679	Xt_10001287	proliferating cell nuclear antigen; cyclin; DNA polymerase delta auxiliaryprotein [Homo sapiens]	Xt4.1-TEgg052j15.3	Xt_10003985	0.528147	0.00731371	pyridoxine 5'-phosphate oxidase [Homo sapiens]	Xt4.1-TEgg014n02.3	5.55067e-05	1.8263	Xt_10007301	B(2)-microglobulin	Xt4.1-EC2BBA9CF11.5	0.00335995	0.545786	Xt_10008463
	Xt4.1-TGas128h03.3	0.000244002	2.00093	Xt_10006163	protein H14A12.3 [imported] - Caenorhabditis elegans	Xt4.1-NISC_nl10h07.3	Xt_10004550	0.525884	0.0067887	adducin 1, alpha [Rattus norvegicus]	Xt4.1-TEgg056k01.3	0.000127806	1.81489	Xt_10008345		Xt4.1-TEgg048h02.3	0.000711669	0.536885	Xt_10006206	similar to chromosome 16 open reading frame 7; ATP synthase, subunit b-like[Rattus norvegicus]
	Xt4.1-TEgg041a05.3	0.00178621	1.97082	Xt_10000080	mitotic phosphoprotein 22 [Xenopus laevis]	Xt4.1-TGas094b16.3	Xt_10001895	0.521976	0.00665288	CGI-119 protein [Homo sapiens]	Xt4.1-TEgg012i23.3	0.000162125	1.77786	Xt_10010830		Xt4.1-IMAGE:7007563.5	0.00063464	0.529628	Xt_10002544	interleukin 8 precursor; LUCT/interleukin-8; monocyte derivedneutrophil-activating protein; monocyte-derived neutrophil chemotactic factor;neutrophil-activating factor; neutrophil-activating peptide 1;neutrophil-activating protein 1; lymphocyte-deriv
	Xt4.1-EC2BBA13AH11.5.5	0.000716624	1.95823	Xt_10010314	microtubule-associated protein 1 light chain 3 alpha; MAP1 light chain 3-likeprotein 1; microtubule-associated proteins 1A/1B light chain 3 [Homo sapiens]	Xt4.1-TTpA014h17.3	Xt_10003720	0.504175	0.00801914	protein kinase C-like 2 [Homo sapiens]	Xt4.1-EC2BBA31DG11.3.5	0.00285668	1.77181	Xt_10009484	vacuolar membrane ATPase	Xt4.1-EC2BBA13AH11.5.5	3.69437e-06	0.52657	Xt_10010314	microtubule-associated protein 1 light chain 3 alpha; MAP1 light chain 3-likeprotein 1; microtubule-associated proteins 1A/1B light chain 3 [Homo sapiens]
	Xt4.1-TEgg078h01.3	0.00869818	1.94171	Xt_10007319		Xt4.1-TNeu105c08.3	Xt_10006791	0.493547	0.00431065	KIAA1085-like protein [Torpedo marmorata]	Xt4.1-TGas005b15.5	0.00036942	1.76394	Xt_10007891		Xt4.1-TEgg116d24.5	0.000345724	0.526106	Xt_10004276	glutathione S-transferase A1; GST, class alpha, 1; glutathioneS-alkyltransferase A1; glutathione S-aryltransferase A1;S-(hydroxyalkyl)glutathione lyase A1; glutathione S-aralkyltransferase A1;GST-epsilon; glutathione S-transferase 2 [Homo sapiens]
	Xt4.1-TNeu058m12.3	0.00554721	1.92641	Xt_10007886		Xt4.1-TEgg019j03.3	Xt_10007859	0.487956	0.00153281		Xt4.1-NISC_ng08a06.3	8.55804e-05	1.75783	Xt_10005707		Xt4.1-TGas088m17.3	0.00149088	0.52365	Xt_10005252
	Xt4.1-TTpA027c16.3.5	0.00236471	1.90229	Xt_10009667	KIAA0874 protein [Homo sapiens]	Xt4.1-TTpA045l09.5.5	Xt_10009169	0.479428	0.000513513	nuclear receptor coactivator 5; coactivator independent of AF-2 [Homo sapiens]	Xt4.1-TEgg045n17.3	3.35429e-07	1.74832	Xt_10003019	hypothetical protein MGC38812 [Mus musculus]	TEgg018c19	0.00214908	0.522136	Xt_10010569
	Xt4.1-TGas072g13.3	0.00869892	1.88658	Xt_10002779	neural proliferation, differentiation and control, 1 [Homo sapiens]	Xt4.1-IMAGE:6991616.5	Xt_10002366	0.46979	0.00911651	hypothetical protein FLJ38771 [Homo sapiens]	Xt4.1-TGas121n09.3	0.00076701	1.7394	Xt_10002942	KED [Nicotiana tabacum]	Xt4.1-TTpA069g15.3.5	0.000233447	0.519652	Xt_10009549	nuclear receptor co-repressor 1; thyroid hormone- and retinoic acidreceptor-associated corepressor 1 [Homo sapiens]
	Xt4.1-EC2BBA28DF01.5	0.00333961	1.88271	Xt_10010823		Xt4.1-TNeu072n19.3	Xt_10001035	0.467515	0.000608063	chromosome 21 open reading frame 33; human HES1 protein, homolog to E.coli andzebrafish ES1 protein [Homo sapiens]	Xt4.1-TTpA014a04.3	0.00136629	1.72531	Xt_10001800	muscle specific gene [Homo sapiens]	Xt4.1-IMAGE:6989589.5.5	3.59268e-06	0.518682	Xt_10008651	fusion, derived from t(12;16) malignant liposarcoma; Fusion gene in myxoidliposarcoma [Homo sapiens]
	Xt4.1-EC2BBA31AE09.5	0.00931121	1.8701	Xt_10006253	oxytocin-neurophysin I preproprotein [Homo sapiens]	Xt4.1-TGas037i19.5	Xt_10005026	0.456735	0.0094872	guanylate binding protein 3 [Homo sapiens]	Xt4.1-TTpA027p17.3.5	0.00265909	1.72491	Xt_10010264	kinesin family member 27 [Homo sapiens]	Xt4.1-TTpA003l20.3	0.00202029	0.517337	Xt_10004842	epithelial sodium channel ENaC alpha subunit [Rana catesbeiana]
	Xt4.1-TNeu113m20.3	0.00328671	1.86634	Xt_10003460		Xt4.1-TEgg016k05.3	Xt_10003740	0.447422	0.00752274		Xt4.1-TNeu056l05.3	0.00247618	1.71758	Xt_10008047	transposase [Rana pipiens]	Xt4.1-EC2BBA14DC05.3	0.000863893	0.515622	Xt_10005211	neuroglobin [Danio rerio]
	Xt4.1-TGas112m22.5	0.00123908	1.86052	Xt_10005063		Xt4.1-TGas136c01.3	Xt_10001016	0.446293	0.0068736	hypothetical protein FLJ10006 [Homo sapiens]	Xt4.1-TEgg004p11.3	0.00311507	1.71193	Xt_10005984	amyotrophic lateral sclerosis 2 (juvenile) chromosome region, candidate 19;partitioning-defective 3-like; partitioning-defective 3-beta [Homo sapiens]	Xt4.1-TEgg046o22.3	0.00271394	0.504275	Xt_10002535	phospholipase A2, group XII; group XII secreted phospholipase A2 [Homo sapiens]
	Xt4.1-EC2BBA7AC08.5	0.00470982	1.85428	Xt_10007927	KIAA1018 protein [Homo sapiens]	Xt4.1-TEgg041a08.3.5	Xt_10009254	0.434316	0.000602649	Similar to signal transducing adaptor molecule (SH3 domain and ITAM motif) 1[Danio rerio]	Xt4.1-TEgg083b22.5	0.000955119	1.69997	Xt_10004459	hypothetical protein MGC10084 [Homo sapiens]	Xt4.1-TGas124o05.3	0.000345139	0.502399	Xt_10003811	putative G protein coupled receptor [Arabidopsis thaliana]
	Xt4.1-TEgg010c20.3	0.00801892	1.84268	Xt_10006948		Xt4.1-TEgg041k22.3.5	Xt_10009008	0.431047	0.00575412	hypothetical protein MGC2577 [Homo sapiens]	Xt4.1-TEgg010e05.3	0.00164504	1.69202	Xt_10003106	cytoplasmic Polyadenylation Element-Binding protein (cpb-3) [Caenorhabditiselegans]	Xt4.1-TGas142j03.3	0.00164414	0.500833	Xt_10007059
	Xt4.1-TGas107c07.3	0.00876709	1.83395	Xt_10005339		Xt4.1-TNeu087h03.3	Xt_10000022	0.4148	0.00505146	protein related with psoriasis [Homo sapiens]	Xt4.1-TNeu061h06.3	0.00168736	1.68587	Xt_10008230		Xt4.1-TTpA009b06.5	0.00102771	0.49567	Xt_10005032
	Xt4.1-TTpA066e13.5	0.00960085	1.83273	Xt_10001156	mitochondrial ribosomal protein L40; nuclear localization signal containingprotein deleted in velocardiofacial syndrome; up-regulated in metastasis [Homosapiens]	Xt4.1-TTpA061c09.5	Xt_10002080	0.407841	0.00343546	caspase 1 isoform gamma precursor; interleukin 1-beta convertase; interleukin1-B converting enzyme; IL1B-convertase [Homo sapiens]	Xt4.1-TGas059i19.3	0.00348879	1.68115	Xt_10006624	putative nuclear protein, with a coiled coil domain, of eukaryotic origin(5P874) [Caenorhabditis elegans]	Xt4.1-TNeu077b01.3	0.000748176	0.495153	Xt_10001745	similar to KIAA0874 protein [Homo sapiens]
	Xt4.1-TEgg044i01.3.5	0.00350882	1.82446	Xt_10008833		Xt4.1-NISC_mq15e09.3	Xt_10010861	0.401078	0.00325512	peripheral myelin protein 22 [Equus caballus]	Xt4.1-TTpA017n08.3	9.59884e-05	1.67913	Xt_10008553	similar to CG33108-PA [Homo sapiens]	Xt4.1-TEgg030f02.3	1.61335e-05	0.48473	Xt_10004854	putative rRNA biogenesis protein; rrp5 homolog; multiple S1 rna binding domainprotein [Schizosaccharomyces pombe]
	Xt4.1-TGas097c11.3.5	0.00612587	1.82416	Xt_10008815	hypothetical protein FLJ10998 [Homo sapiens]	Xt4.1-TEgg063i23.5	Xt_10005213	0.397005	0.00683371	hypothetical protein FLJ11155 [Homo sapiens]	Xt4.1-IMAGE:6995926.5.5	0.00110801	1.66051	Xt_10009851	ubiquitin-conjugating enzyme E2L 3 [Homo sapiens]	Xt4.1-IMAGE:6991375.5.5	0.00288876	0.480109	Xt_10010541	mast cell growth factor, isoform b, precursor [Homo sapiens]
	Xt4.1-TGas087n11.3.5	0.00373003	1.82377	Xt_10009886	RIKEN cDNA 2610027O18 [Mus musculus]	Xt4.1-TEgg001f17.3	Xt_10002773	0.389753	0.00334056	similar to RIKEN cDNA 1190003A07 [Rattus norvegicus]	Xt4.1-TEgg048m17.3	0.000629719	1.65933	Xt_10001095	similar to RIKEN cDNA 4931400A14 [Rattus norvegicus]	Xt4.1-EC2BBA11CG12.5	0.00204172	0.475266	Xt_10005371
	Xt4.1-TGas130o13.3	0.00562627	1.79978	Xt_10003993	activator of transcription of nitrogen-regulated genes; inactivated by increasesin intracellular glutamate levels; Gat1p [Saccharomyces cerevisiae]	Xt4.1-TNeu113i13.3.5	Xt_10009655	0.388593	0.00357422		Xt4.1-TGas141g06.3	0.00293712	1.65373	Xt_10006702	related RAS viral (r-ras) oncogene homolog 2; oncogene TC21 [Homo sapiens]	Xt4.1-TNeu087j08.3	5.58976e-05	0.466523	Xt_10002309	unknown [Xenopus laevis]
	Xt4.1-TGas071a06.3	0.00963689	1.79736	Xt_10006478		Xt4.1-TNeu108h13.3	Xt_10003152	0.381023	0.00271015	topoisomerase (DNA) II binding protein [Homo sapiens]	Xt4.1-TEgg059j20.3	0.00127451	1.627	Xt_10004195	exostoses (multiple)-like 2; Exostoses, multiple, like 2 [Homo sapiens]	Xt4.1-TTpA017p20.3	0.0016778	0.457282	Xt_10006167	SUMO-1-specific protease [Homo sapiens]
	Xt4.1-IMAGE:6992857.3	0.0089805	1.76654	Xt_10000746	nervy	Xt4.1-TGas123p21.3	Xt_10002417	0.379181	0.00650295	glycine dehydrogenase (decarboxylating; glycine decarboxylase, glycine cleavagesystem protein P) [Homo sapiens]	Xt4.1-EC2BBA26CF10.5	4.03201e-06	1.60936	Xt_10005822	U6 snRNA-associated Sm-like protein LSm7 [Homo sapiens]	Xt4.1-TTpA066k09.3.5	0.0026169	0.453123	Xt_10009559	cadherin 1, type 1 preproprotein; cadherin 1, E-cadherin (epithelial);uvomorulin; calcium-dependent adhesion protein, epithelial; cell-CAM 120/80;Arc-1 [Homo sapiens]
	Xt4.1-EC2BBA34DB07.3	0.0011378	1.75941	Xt_10002431	peroxiredoxin 3 isoform a precursor; antioxidant protein 1;thioredoxin-dependent peroxide reductase precursor [Homo sapiens]	Xt4.1-EC2BAA1DF07.5	Xt_10001797	0.37021	0.00948833	anterior gradient 2 homolog (Xenepus laevis); anterior gradient 2 (Xenopuslaevis, secreted cement gland) homolog; anterior gradient 2 (Xenepus laevis)homolog [Homo sapiens]	Xt4.1-EC2BBA29CB12.3.5	0.00128417	1.5984	Xt_10010213	PHD finger protein 10 isoform a; PHD zinc finger protein XAP135 [Homo sapiens]	Xt4.1-EC0CBA004BD07.5	4.44328e-05	0.448396	Xt_10005705	allatostatin receptor (XL949) [Caenorhabditis elegans]
	Xt4.1-TTpA012b04.5.5	0.000135253	1.75936	Xt_10009267	type I transmembrane protein, component of COPII-coated, ER-derived transportvesicles; Emp24p [Saccharomyces cerevisiae]	Xt4.1-TGas060b14.5	Xt_10004551	0.348708	0.00606275	KIAA1737 protein [Homo sapiens]	Xt4.1-TGas062j03.3	0.000521106	1.59657	Xt_10002464		Xt4.1-TEgg074e13.3	0.00126461	0.437988	Xt_10000046	hypothetical protein FLJ32942 [Homo sapiens]
	Xt4.1-TTpA042m14.3	0.00911952	1.75455	Xt_10006199		Xt4.1-EC2BBA22AD10.5	Xt_10010884	0.337896	1.49418e-05		Xt4.1-TNeu116l09.5	0.000898318	1.59171	Xt_10008337		Xt4.1-TNeu085l07.3.5	0.00276391	0.437129	Xt_10009813	barren [Homo sapiens]
	Xt4.1-TTpA059i15.5	0.00209027	1.73359	Xt_10004047	G-substrate [Homo sapiens]	Xt4.1-TNeu080l11.3	Xt_10005050	0.329679	0.000987382	ELL [Drosophila melanogaster]	Xt4.1-TGas098i13.5	0.00264136	1.58837	Xt_10008545		Xt4.1-TGas135g21.3	0.000177136	0.431098	Xt_10002557	PTPRF interacting protein binding protein 1 isoform 1; liprin-beta 1; liprinrelated protein; protein-tyrosine phosphatase receptor-type fpolypeptide-interacting protein-binding protein 1 [Homo sapiens]
	Xt4.1-TNeu071b21.3	0.00717105	1.73332	Xt_10007901		Xt4.1-TEgg053p20.3.5	Xt_10010371	0.324395	0.00612478	k+ channel tetramerisation containing protein (XB927) [Caenorhabditis elegans]	Xt4.1-TTpA056g07.5	0.00170785	1.5883	Xt_10005893	deaD	Xt4.1-TEgg036o02.3.5	0.000614907	0.430957	Xt_10009560	prion-like Q/N-rich domain protein PQN-44, Prion-like Q/N-rich domain protein(50.9 kD) (pqn-44) [Caenorhabditis elegans]
	Xt4.1-IMAGE:7017948.5	0.00471546	1.70978	Xt_10004371	unnamed protein product [Escherichia coli]	Xt4.1-EC2CAA9DG05.5	Xt_10002530	0.322716	0.000803835	mitochondrial ribosomal protein L21 isoform d [Homo sapiens]	Xt4.1-TEgg046b02.3.5	0.00331673	1.56187	Xt_10009729	BUB1 budding uninhibited by benzimidazoles 1 homolog; budding uninhibited bybenzimidazoles 1 (yeast homolog); hBUB1; putative serine/threonine-proteinkinase [Homo sapiens]	Xt4.1-TEgg019n12.3	0.00288993	0.42182	Xt_10000748	hypothetical protein FLJ32234 [Homo sapiens]
	Xt4.1-TTpA077b01.3	0.00173475	1.70739	Xt_10002052		Xt4.1-TGas054k15.3	Xt_10003608	0.307445	0.00993821		Xt4.1-TGas108h05.3	0.0028177	1.553	Xt_10000387	RW1 protein [Mus musculus]	Xt4.1-TNeu072k09.3.5	0.00330503	0.421518	Xt_10010358	Similar to splicing factor, arginine/serine-rich 11 [Danio rerio]
	Xt4.1-TNeu090i11.3	0.00949534	1.69025	Xt_10007171		Xt4.1-TGas122d19.3.5	Xt_10010726	0.29781	0.00951677	fetuin B; fetuin-like protein [Homo sapiens]	Xt4.1-TTpA018d07.3.5	0.00103857	1.54908	Xt_10010442		Xt4.1-TTpA035a23.5	0.000995882	0.419646	Xt_10001362
	Xt4.1-TNeu068e21.5	0.000354909	1.68652	Xt_10008546		Xt4.1-TNeu057i19.5	Xt_10004904	0.273167	0.00393937		Xt4.1-TTpA044c15.3	0.00099085	1.54504	Xt_10001378		Xt4.1-IMAGE:6982008.5	0.00344345	0.418596	Xt_10002166	Shroom-related protein; F-actin-binding protein; likely ortholog of mouse Shroom[Homo sapiens]
	Xt4.1-IMAGE:6998458.3	0.00180961	1.67018	Xt_10005493	cytoplasmic cysteine conjugate-beta lyase; glutamine-phenylpyruvateaminotransferase [Homo sapiens]	Xt4.1-TGas098j07.3	Xt_10004164	0.241236	0.000309116	mucin 2 [Homo sapiens]	Xt4.1-TNeu074d04.5	0.00176184	1.53354	Xt_10008010		Xt4.1-TEgg021g12.3	0.00135642	0.416765	Xt_10001311	BCL2/adenovirus E1b 19 kDa interacting protein 3a [Danio rerio]
	Xt4.1-TNeu107g16.3	0.00310393	1.66826	Xt_10004666	CGI-12 protein [Homo sapiens]	Xt4.1-TGas119e13.3	Xt_10003942	0.236295	0.00231483	laminin, beta 1 precursor [Homo sapiens]	Xt4.1-EC2BBA16BD11.5	0.00257851	1.52763	Xt_10006638		Xt4.1-TEgg071a22.3	7.43857e-05	0.404265	Xt_10006012	hypothetical protein FLJ32745 [Homo sapiens]
	Xt4.1-TEgg021k08.3	0.00939595	1.66292	Xt_10000690	Unknown (protein for MGC:66325) [Danio rerio]	Xt4.1-TNeu134d03.3	Xt_10007750	0.224185	0.000399202	lamin B receptor; integral nuclear envelope inner membrane protein [Homosapiens]	Xt4.1-NISC_ng14g01.3	0.00094917	1.51667	Xt_10006260	like mouse brain protein E46 [Homo sapiens]	Xt4.1-TNeu111f22.3	0.000654209	0.401976	Xt_10004943
	Xt4.1-TTpA031a15.3	0.00262909	1.64166	Xt_10005051	similar to KIAA1417 protein [Rattus norvegicus]	Xt4.1-TEgg068a14.3	Xt_10002065	0.223328	0.00774937	hypothetical protein FLJ25059 [Homo sapiens]	Xt4.1-TTpA051j17.3.5	9.9733e-05	1.50904	Xt_10010370	hypothetical protein CAB56184 [Homo sapiens]	Xt4.1-TGas097a15.3.5	0.00322942	0.401974	Xt_10009222	hypothetical protein MGC13045 [Homo sapiens]
	Xt4.1-TGas132g13.3	0.00513047	1.6378	Xt_10001307	tetratricopeptide repeat domain 1 [Homo sapiens]	Xt4.1-EC2BBA20DB03.3	Xt_10004076	0.220596	0.000724437		Xt4.1-TGas122h12.3	0.00314841	1.50617	Xt_10001147	similar to KIAA1285 protein [Mus musculus]	Xt4.1-EC2BBA18AA05.5	0.000497244	0.39694	Xt_10002239
	Xt4.1-TGas050o02.5	8.03177e-05	1.63597	Xt_10010772	hypothetical protein MG02855.4 [Magnaporthe grisea 70-15]	Xt4.1-TTpA019i23.3	Xt_10002928	0.216722	0.00329679	EG:86E4.2 [Drosophila melanogaster]						Xt4.1-TTpA074a06.5	0.0009988	0.392177	Xt_10003265	RIKEN cDNA 1200013F24 [Mus musculus]
	Xt4.1-TEgg074f01.3	0.0064649	1.61551	Xt_10007462		Xt4.1-TGas127c06.3	Xt_10002883	0.207205	1.77695e-05							Xt4.1-TNeu120i02.3	0.0018036	0.389531	Xt_10007018	UPF2 regulator of nonsense transcripts homolog; regulator of nonsensetranscripts 2; yeast Upf2p homolog [Homo sapiens]
	Xt4.1-TGas119j07.3	0.00457028	1.60391	Xt_10004450	nuclear respiratory factor 1 [Homo sapiens]	Xt4.1-TEgg058b04.3	Xt_10000338	0.205444	0.00514491	transcription factor IIB [Homo sapiens]						Xt4.1-TNeu074f21.3	0.00270136	0.383597	Xt_10004248	crocodile CG5069-PA [Drosophila melanogaster]
	Xt4.1-TEgg066p11.3.5	0.00660015	1.60182	Xt_10009249	transcription factor, CCAAT-binding - chicken	Xt4.1-TEgg077i13.3	Xt_10006657	0.170374	0.00551524	ribonuclease PH-like (26.1 kD) (4N865) [Caenorhabditis elegans]						Xt4.1-TEgg033b20.3	0.0031563	0.368317	Xt_10004714	hypothetical protein FLJ13119 [Homo sapiens]
	TEgg018c19	0.00533961	1.59868	Xt_10010569		Xt4.1-TEgg016p21.3	Xt_10006862	0.141847	0.00499254	apurinic/apyrimidinic endonuclease 2; apurinic/apyrimidinic endonuclease-like 2;APEX nuclease-like 2 [Homo sapiens]						Xt4.1-TGas124p22.3	0.000193468	0.367098	Xt_10004354
	Xt4.1-TGas142p21.3	0.00357872	1.59743	Xt_10003468	Member of error-free postreplication DNA repair pathway; Mms2p [Saccharomycescerevisiae]	Xt4.1-IMAGE:7022943.5	Xt_10003668	0.141678	0.000386075	similar to RIKEN cDNA 2410043F08 [Rattus norvegicus]						Xt4.1-IMAGE:6992610.5.5	0.00104272	0.359191	Xt_10009564	inosine-uridine preferring nucleoside hydrolase [Xanthomonas campestris pv.campestris str. ATCC 33913]
	Xt4.1-IMAGE:7023334.5	0.00890437	1.59461	Xt_10006073	freeze-responsive liver protein Li16 [Rana sylvatica]	Xt4.1-TTpA003b11.3	Xt_10008173	0.139123	0.00161022							Xt4.1-EC2CAA15BH03.5	0.0010166	0.354521	Xt_10006986
	Xt4.1-EC2CAA39AH03.5.5	0.0093959	1.5858	Xt_10009310	hematopoietic SH2 protein; adaptor in lymphocytes of unknown function X [Homosapiens]	Xt4.1-TNeu052g23.3	Xt_10003933	0.13446	0.00664241	zinc finger protein 184 (Kruppel-like) [Homo sapiens]						Xt4.1-TEgg058d19.3.5	0.00153869	0.332994	Xt_10009721	protein kinase, AMP-activated, gamma 1 non-catalytic subunit; AMPK gamma 1;Protein kinase, AMP-activated, noncatalytic, gemma-1 [Homo sapiens]
	Xt4.1-TEgg038j06.3	0.00518754	1.58134	Xt_10008596		Xt4.1-TNeu122d03.3.5	Xt_10008763	0.114083	0.00116739	alpha 1 actin precursor; alpha skeletal muscle actin [Homo sapiens]						Xt4.1-TGas082g16.5	5.43837e-05	0.315785	Xt_10005160	LD04782p [Drosophila melanogaster]
	Xt4.1-TNeu113o22.3	0.0057376	1.5784	Xt_10002522		Xt4.1-TTpA017o20.3	Xt_10007307	0.112845	0.0088949							Xt4.1-TNeu103g24.3.5	0.000989747	0.314927	Xt_10010438	T-box 2 [Homo sapiens]
	Xt4.1-TTpA018b22.3	0.0059304	1.57228	Xt_10002709	hypothetical protein MGC10120 [Homo sapiens]	Xt4.1-EC2CAA37BA02.3	Xt_10006209	0.108628	0.00788203							Xt4.1-TNeu025n22.5	0.00259032	0.313765	Xt_10006469
	Xt4.1-TTpA027c24.5.5	0.0042725	1.56994	Xt_10009906	collagen, type VI, alpha 1 precursor; collagen VI, alpha-1 polypeptide [Homosapiens]	Xt4.1-TGas017d05.5	Xt_10008106	0.0775723	0.00172782							Xt4.1-IMAGE:7005716.5	0.00296093	0.306803	Xt_10005189	SMC6 protein [Homo sapiens]
	Xt4.1-TTpA024n18.3	0.00778319	1.56442	Xt_10000928		Xt4.1-TGas027d17.5.5	Xt_10010472	0.0494477	0.00623425	ENSANGP00000010748 [Anopheles gambiae]						Xt4.1-TNeu119c20.3	0.0024353	0.30448	Xt_10003827
	Xt4.1-TTpA043n04.5	0.0079046	1.56224	Xt_10004138	hypothetical protein FLJ10853 [Homo sapiens]	Xt4.1-TGas096d05.3	Xt_10004439	0.0491386	0.0033952							Xt4.1-TTpA075l24.3	0.0029025	0.298003	Xt_10005165	annexin B9a [Drosophila melanogaster]
	Xt4.1-TNeu058b04.3	0.00150868	1.5622	Xt_10002455	converts ATP and uridine to ADP and UMP; Urk1p [Saccharomyces cerevisiae]	Xt4.1-TEgg012j04.3	Xt_10006686	0.0175165	0.00599246	RAD52B [Homo sapiens]						Xt4.1-IMAGE:7004904.5	0.00298032	0.289507	Xt_10003137
	Xt4.1-EC2BBA29AH02.5	0.0022215	1.55527	Xt_10004982		Xt4.1-TEgg036h14.3	Xt_10004170	0.012203	0.00477527							Xt4.1-TEgg130d15.5	0.000661654	0.286878	Xt_10005118	chromosome 6 open reading frame 107; similar to CG31653-PA [Homo sapiens]
	Xt4.1-TNeu090j15.3	0.000122426	1.55192	Xt_10002997	Similar to cAMP responsive element binding protein 1 [Xenopus laevis]	Xt4.1-TGas048p16.5	Xt_10010848	0.0112805	0.00123079							Xt4.1-TGas017d05.5	0.0020708	0.28319	Xt_10008106
	Xtlgl2	0.00469209	1.54466	Xt_10010689												Xt4.1-TNeu127g18.3	0.0025277	0.27848	Xt_10008589
	Xt4.1-TGas092l13.3	0.00307742	1.53258	Xt_10001306	hypothetical protein FLJ40452 [Homo sapiens]											Xt4.1-TEgg044j03.3	0.000334563	0.267959	Xt_10001959	NADPH-dependent FMN and FAD containing oxidoreductase [Homo sapiens]
	Xt4.1-TEgg038o07.3	0.00706731	1.51485	Xt_10001191												Xt4.1-EC2BBA27CC09.5	0.00217049	0.265973	Xt_10010784
	Xt4.1-IMAGE:6976218.5.5	0.00540773	1.51342	Xt_10009891	death-associated protein 3; mitochondrial 28S ribosomal protein S29 [Homosapiens]											Xt4.1-TGas059o04.3	0.00290141	0.265435	Xt_10001336	complement component factor B [Danio rerio]
	Xt4.1-TEgg070e02.3	0.00896499	1.50622	Xt_10002930	TRAF interacting protein TRIP [Homo sapiens]											Xt4.1-TTpA004i15.5.5	0.00289512	0.260095	Xt_10008870	hypothetical protein BC013949 [Homo sapiens]
	Xt4.1-TNeu012d05.5	0.00494232	1.50275	Xt_10006375	seven up CG11502-PC [Drosophila melanogaster]											Xt4.1-TNeu131h24.3	0.000816285	0.245741	Xt_10006155
	Xt4.1-IMAGE:6977573.3	0.0053384	1.50117	Xt_10008007	voltage-dependent calcium channel gamma-1 subunit [Rattus norvegicus]											XtSpred-1	0.00232567	0.238462	Xt_10010697
	Xt4.1-IMAGE:6983280.5	0.00350186	1.50062	Xt_10005193	ariadne homolog, ubiquitin-conjugating enzyme E2 binding protein, 1; ariadne,Drosophila, homolog of [Homo sapiens]											Xt4.1-EC2CAA1AD02.5	0.00298856	0.190941	Xt_10005977
																Xt4.1-TNeu124e06.3	2.51625e-05	0.175569	Xt_10004993	glypican 4 [Homo sapiens]
																Xt4.1-TGas096h09.3	3.98656e-06	0.171336	Xt_10001903
																Xt4.1-TEgg050d12.3	0.00293264	0.166615	Xt_10005808
																Xt4.1-IMAGE:5384618.5.5	0.000837209	0.148839	Xt_10008945	p28 ING5 [Homo sapiens]
																Xt4.1-TGas101m12.3	0.000384022	0.112116	Xt_10005335	Unknown (protein for MGC:56512) [Danio rerio]
																Xt4.1-TNeu134f21.3	0.00212774	0.104946	Xt_10006218
																Xt4.1-TEgg032k03.3	0.00109486	0.0965857	Xt_10007960
																Xt4.1-TNeu097p08.3	4.3874e-07	0.0925903	Xt_10007144	PHD zinc finger transcription factor [Mus musculus]
																Xt4.1-EC0CBA001AD08.5.5	0.0034005	0.0923088	Xt_10010509
																Xt4.1-TNeu116k15.3	7.28775e-05	0.0921729	Xt_10000358	RIKEN cDNA 6330569M22 [Mus musculus]
																XtG-alpha-q	0.000581663	0.0766174	Xt_10010790
																Xt4.1-EC2BBA11DC01.5	0.00173501	0.0745573	Xt_10008171
																Xt4.1-IMAGE:6981403.5.5	0.00147167	0.0673689	Xt_10009741	RNA binding protein [Homo sapiens]
																Xt4.1-TGas097b13.3	0.00128973	0.0637546	Xt_10006223	cadherin 2, type 1 preproprotein; N-cadherin 1; cadherin 2, N-cadherin(neuronal); neural cadherin; calcium-dependent adhesion protein, neuronal [Homosapiens]
																Xt4.1-TEgg037a21.5	0.000741122	0.061023	Xt_10007007	tyrosylprotein sulfotransferase 2; Tyrosylprotein phosphotransferase 2 [Homosapiens]
																Xt4.1-TNeu124j18.3	0.000505339	0.0602364	Xt_10002748	nasopharyngeal epithelium specific protein 1 [Homo sapiens]
																Xt4.1-TEgg072h12.3	8.92217e-06	0.0546036	Xt_10001737
																Xt4.1-TGas023m20.5	0.000980597	0.0538616	Xt_10008082	hypothetical protein FLJ22378 [Homo sapiens]
																Xt4.1-TEgg061h20.3	0.000104675	0.0505761	Xt_10005077	trichohyalin [Homo sapiens]
																Xt4.1-TTpA028l20.3	0.00346999	0.036947	Xt_10004283	ATP/GTP-binding protein [Homo sapiens]
																Xt4.1-TEgg078l17.3	1.68576e-06	0.0316396	Xt_10010738	liver-specific bHLH-Zip transcription factor; Lisch7 protein [Mus musculus]
																Xt4.1-TTpA020j10.5	0.000543509	0.0275706	Xt_10010742	Chain A, Fucose Binding Lectin
																Xt4.1-TTpA050n08.5	4.53642e-05	0.0274076	Xt_10007869	phosphofurin acidic cluster sorting protein 1; cytosolic sorting protein PACS-1[Homo sapiens]
																Xt4.1-TEgg078l16.3	0.000568556	0.0265732	Xt_10000106	F-box only protein 4 isoform 1; F-box protein Fbx4 [Homo sapiens]
																Xt4.1-IMAGE:7017732.5	5.04795e-06	0.0138011	Xt_10003613	glutamate dehydrogenase 1 [Homo sapiens]
